# Supplementary material
Source: PubMed Central journal article supplement (PMC4456450)
Supplement: MCB.00294-15_zmb999100868so1.pdf [file MCB.00294-15_zmb999100868so1.pdf]

## Supplementary data

### Complete *cis*-exclusion upon duplication of E $\mu$ enhancer at the immunoglobulin heavy-chain locus

Nadine Puget, Claire Leduc, Zéliha Oruc, Mohammed Moutahir, Marc Le Bert and Ahmed Amine Khamlichi

### Supplementary Results and Discussion

#### 1- B cell development in the fetal liver, bone marrow and peripheral lymphoid organs.

The effect of premature expression of IgG3 on B cell development in various compartments of homozygous mice was analysed by FACS. In the bone marrow, we found a decrease in the B220<sup>+</sup> population. In contrast, in the spleen, the Peyer's patches, the peritoneum, and the fetal liver, the percentage of total B220<sup>+</sup> was slightly higher in A150 mice than in WT controls (Fig. S2A).

A striking and constant finding was that IgM-expressing B cells were barely detectable (<1%) in every compartment analysed in A150 mice, while IgG3-expressing B cells formed the vast majority of B cell populations (Fig. S2B-S2F). The lack of IgM expression was checked by using a polyclonal anti-IgM antibody or a mAb against the IgM<sup>a</sup> allotype, since the mutant allele was derived from 129Sv1 mouse strain.

In the bone marrow, the pro-B cell compartment was slightly affected while pre-B cell population was clearly reduced. Similar ratios of pro-B and pre-B cell subsets were obtained by gating on IgM<sup>-</sup> fraction for WT mice, on IgG3<sup>-</sup> fraction for A150 mice, or on  $\kappa^-$  for both (Fig. S2G). Immature B cells (B220<sup>+</sup>AA4.1<sup>+</sup> $\kappa^+$ ) were slightly decreased in A150 mice, while circulating B cells (B220<sup>+</sup>AA4.1<sup>-</sup> $\kappa^+$ ) were increased (Fig. S2H).

The data show that premature expression of  $\gamma 3$  heavy chain can drive B cell development in the bone marrow, with a decrease in pre-B cell population and to some extent immature B cell

population. Despite this impairment, IgG3-expressing B cells can populate the various lymphoid compartments. Importantly, the mutation leads to a complete absence of IgM-surface expression throughout B cell development.

In view of the above findings, together with the data reported in the main text regarding allelic exclusion, it is important to note that despite premature expression,  $\gamma 3$  heavy chain was not as efficient as  $\mu$  heavy chain in driving early B cell development. The B220<sup>+</sup> population was decreased in the bone marrow which correlated with a markedly reduced pre-B cell compartment. While proper surface expression of the  $\mu$  pre-BCR is required to deliver proliferative and survival signals that allow pre-B cells to mature to the next stage (1, 2), it is plausible that surface expression of the  $\gamma 3$  pre-BCR is compromised (3). Additionally, there is evidence that proximal V<sub>H</sub>-containing heavy chains do not efficiently pair with surrogate light chains (4), which may impact the pre-BCR function. In this regard, we cannot exclude the possibility that failure of proximal V<sub>H</sub>-containing  $\mu$  heavy chains to pair with surrogate light chains may contribute to *cis*-exclusion in A150 mice. Still, this alone does not explain why V(D)J rearrangements are restricted to proximal V<sub>H</sub> segments (see discussion in the main text). Whether  $\gamma 3$  and  $\mu$  pre-BCRs share the same signalling pathway or whether they are equally efficient in mediating allelic exclusion is presently unknown. From our data that show that *prematurely* expressed  $\gamma 3$  heavy chain can mediate an efficient allelic exclusion, it does not follow that  $\gamma 3$  and  $\mu$  pre-BCRs would be equally efficient when both the mutant and WT alleles have to undergo V(D)J recombination (3, 5). This would rather imply that  $\mu$  pre-BCR is actually more powerful in a genuine allelic exclusion.

## **2- B cell development and homing to peripheral lymphoid organs**

In the spleen, IgD was, just as IgM, undetectable in the mutant mice (Fig. S2I). In agreement with previous findings (3), the percentage of marginal zone (MZ) B cells was a ~2-fold higher in

A150, whereas the percentage of follicular (FO) B cells was essentially similar to WT controls (Fig. S2J).

In the peritoneum of mutant mice, the increase in B220<sup>+</sup> fraction correlated with an increase in the B-2 population (B220<sup>+</sup>CD43<sup>-</sup>), while the B220<sup>+</sup>CD43<sup>+</sup> fraction remained essentially unchanged (Fig. S2K, upper panels). Surprisingly, whereas B220<sup>+</sup>CD5<sup>+</sup>, B-1a cells, were abundant in the peritoneum of WT mice, they were very rare in that of A150 mice (Fig. S2K, lower panels). Accordingly, the percentage of IgG3<sup>+</sup>CD5<sup>+</sup> cells in the peritoneum of A150 mice was less than 2% compared to ~20% of IgM<sup>+</sup>CD5<sup>+</sup> (Fig. S2K). This contrasts with the situation in fetal liver where the two populations were comparable (Fig. S2L).

Thus, in the spleen, IgG3-expressing B cells preferentially home to the marginal zone. In stark contrast to WT, the mutant IgG3-expressing B-1a cells are very rare in the peritoneum, indicating that IgG3-expressing B cells do not develop peritoneal CD5<sup>+</sup> cells. In contrast, they do so in the fetal liver, excluding the possibility that IgG3 and CD5 are incompatible with regard to surface expression.

### **3- Light chain expression under allelic inclusion, allelic exclusion and isotypic competition**

The variable domains of  $\gamma$ 3 heavy chain (in A150) and  $\mu$  heavy chain (in B1-8) preferentially pair with  $\kappa$  and  $\lambda$  light chains respectively, and are specific for HEL and NP respectively (6-8). In order to check whether  $\gamma$ 3 and  $\mu$  heavy chains would compete for  $\kappa$  or  $\lambda$  light chains, and the potential effect of allelic inclusion on the  $\kappa/\lambda$  ratio, we looked at the surface expression pattern of  $\kappa/\lambda$  light chains. Strikingly, while B1-8/B1-8 B cells mainly expressed  $\lambda$  light chains, the vast majority of splenic B cells of other genotypes expressed  $\kappa$  light chains (Fig. S2M).

Remarkably, B cells that prematurely express IgG3 can out-compete IgM-expressing B cells in bone marrow of A150/WT mice (Fig. 1). The ratio is relatively more pronounced in the spleen where 76% of B cells express IgG3 only (Fig. S2N). In A150/B1-8 mice, where both isotypes are

prematurely expressed, the vast majority of B cells (94%) were allelically included and co-produced IgM and IgG3 in the spleen (Fig. S2N).

Thus, IgG3 and IgM can efficiently drive B cell development under allelic inclusion, and competition for  $\kappa$  light chain does not appear to be a limiting factor. Moreover, for allelically included isotypes, there is seemingly a selective advantage for  $\kappa$ -expressing cells.

#### **4- The loss of IgG3 expression in A150 heterozygotes results from a deletional process**

We considered a deletional process on the mutant allele that could be associated with either V(D)J recombination (because of early transcription of the ectopic  $J_{H3}$  and  $J_{H4}$  segments) or CSR (because of a fairly abundant transcription of  $S_{\mu}$  and  $S_{\gamma3}$ ). In both V(D)J recombination-, and CSR-associated deletions, different parts of the ectopic transcription unit should be lost. Accordingly, we designed different primers to distinguish between the two processes. Genomic DNA was extracted from sorted bone marrow  $IgM^{b+}$  and  $IgG3^{+}$  single-expressers, and assayed for V(D)J recombination and CSR.

The integrity of the inserted cassette was first checked and yielded the expected amplicons in the right genotypes (see  $I_{\mu}F/3'SpeIR$ ,  $I_{\mu}F/3'SphIR$ , and  $I_{\gamma3}F/3'SphIR$ . Fig. S3A). Amplicons spanning the insertion site on the WT alleles ( $5'PmeIF/3'PmeIR$ ) were, as expected, detected in both  $IgM^{+}$  and  $IgG3^{+}$  heterozygous populations, but not in homozygous A150 control (Fig. S3A). Crucially, by using a reverse primer that binds the 5' part of the ectopic sequence, the expected amplicon ( $5'PmeIF/3'loxPR$ ) was readily detected in  $IgG3^{+}$  population, but was barely detectable in  $IgM^{+}$  population (Fig. S3A). A similar pattern was obtained by using primers that amplify the ectopic VDJ exon/intron ( $VDJ_{A150}F/5'J_{H3}R$ ) (Fig. S3A). Quantification of the signals of  $5'PmeIF/3'loxPR$  and  $VDJ_{A150}F/5'J_{H3}R$  amplicons indicated that the vast majority (>90%) of the signals disappeared from the mutant allele of  $IgM^{b+}$  population (Fig. S3A), indicating that the ectopic cassette was deleted in most of  $IgM^{b+}$  cells.

If low levels of S $\mu$ /S $\gamma$ 3 CSR occurred on the mutant allele, then switch products might be amplified by DC-PCR. A very faint signal was detected in one IgG3<sup>+</sup> population (Fig. S3B), and only upon a nested PCR. Assuming that it reflects genuine CSR events, a possible explanation is that it represents very rare CSR events that may have occurred after a (or some) productive V-DJ rearrangement(s) took place on the A150 allele. Compared to the control DC-PCR, a rough approximation would be that the percentage of switching alleles might not exceed 1% (Fig. S3B). We conclude that CSR is not the main process that mediates the loss of IgG3 expression in IgM<sup>b+</sup> population. Nonetheless, even low levels of CSR on A150 allele may be sufficient to generate rare clones, which may be selected for further expansion. In support for the potential involvement of CSR, a low frequency of switch events was detected in the bone marrow (*e.g.* 9, 10) and some transformed pre-B cell lines can undergo CSR *in vitro* (11, 12).

A V(D)J recombination-associated deletion is expected to target either the ectopic J<sub>H3</sub> or J<sub>H4</sub> RSSs (hereafter called ectopic V(D)J recombination) (Fig. S3C, upper scheme). Therefore, with a primer that binds 5' of J<sub>H3</sub> and a degenerate primer that binds the RSSs of most of D segments, one should detect DJ<sub>H1</sub> and DJ<sub>H2</sub> recombination on both alleles in the IgG3<sup>+</sup> fraction. In contrast, one should expect a decrease of D-J<sub>H</sub> recombination signal in IgM<sup>b+</sup> fraction, since the only DJ<sub>H1</sub> and DJ<sub>H2</sub> amplicons will originate from the endogenous D-J<sub>H</sub> cluster of the A150 allele (Fig. S3C, S4). That is indeed the case (Fig. S3C). Although this assay does not distinguish between recombined endogenous and ectopic J<sub>H3</sub> and J<sub>H4</sub> segments, the very low frequency of DJ<sub>H1</sub> and DJ<sub>H2</sub> recombination events in IgM<sup>b+</sup> population (~6%) strongly suggests that ectopic D-J<sub>H</sub> recombination is the major mechanism that led to the loss of A150 unit in the precursors of this population.

An accurate quantification of the contribution of each allelic configuration (Fig. S4) during ectopic V(D)J recombination in heterozygotes is difficult because the sorted populations have been selected at various checkpoints. We can only reconstruct the events that likely occurred in their precursors. A plausible scenario is that the A150 and WT alleles undergo D-J<sub>H</sub> recombination in pro-B cells regardless of the J<sub>H</sub> segments used on the A150 allele. V<sub>H</sub>-DJ<sub>H</sub> recombination may head first on one allele, and the outcome would depend on the correct reading-frame for feed-back inhibition. If this requirement is not fulfilled, the second allele then undergoes V<sub>H</sub>-DJ<sub>H</sub> recombination. In a fraction of the ~11% IgM<sup>b+</sup> population, 40% and 24% of  $\gamma$ 3 heavy chain cDNAs containing proximal V<sub>H</sub> and distal V<sub>H</sub> segments, respectively, displayed correct reading-frames on the A150 allele (Table S1). In another fraction of IgM<sup>b+</sup> population, the ectopic transcription unit was intact as indicated by the presence of VDJ<sub>A150</sub>-C $\gamma$ 3 transcripts. Our interpretation is that some of the  $\gamma$ 3 heavy chains did not pair with surrogate light chains, potentially leading to a situation where allelic exclusion was displayed at the protein level despite allelic inclusion at the genomic level (13). The other  $\gamma$ 3 heavy chains that paired with surrogate light chains may have done so in few clones which would give rise to double-expressers, and may be selected and expanded. This scenario does obviously not preclude the productive pairing of  $\gamma$ 3 heavy chains with light chains as a further checkpoint. In these scenarios, we can not *a priori* exclude the possibility that surface expression of a subset of  $\gamma$ 3 pre-BCRs may be compromised and/or that they deliver a weak signal, which would enable a time window during which  $\mu$  pre-BCRs would be expressed and deliver a stronger signal.

Overall, these interpretations would imply that IgM and IgG3 double-expression confers a selective advantage over single isotype expression. This may explain the relatively high percentage (~7%) of IgM<sup>+</sup>IgG3<sup>+</sup> double-expressers in the spleen. In support of this interpretation, we also found that the percentage of double expressers was very high in A150/B1-8 spleens.

## **5- The primary repertoire is not of fetal origin and out-of-frame V(D)J rearrangements are modestly increased**

Proximal  $V_H$ - $DJ_H$  recombination frequency was reduced in A150 pro-B cells. Still, this does not exclude the possibility that the residual recombined alleles may actually display a high proportion of unproductive rearrangements. Additionally, IgG3-expressing B cells were readily detected in the fetal liver, which hints to the possibility that the primary repertoire of the adult A150 mice may represent a vestige of the fetal repertoire. The terminal transferase is highly active in pro-B cells, but is barely detectable in fetal liver (14). Therefore, if the repertoire were of fetal origin, one would expect an absence or a drastic decrease in N-region addition. In an attempt to explore this issue, we cloned and sequenced 38 and 43 independent rearranged proximal  $V_H$  $DJ_{H4}$  genes from sorted WT and A150 pro-B cells respectively. The junctional diversity flanking the rearranged D segments was used to check the clonality of the sequences.

While there was an overall balanced proportion of productive and non-productive rearrangements in WT controls (55% versus 45% respectively), we found a relative increase of non-productive rearrangements in A150 (61%) (Fig. S6 and Table S2). Inspection of the junction sequences showed no obvious difference between A150 mutants and WT controls. There was no evidence for over-representation of a D gene segment family in A150, nor an anomaly regarding the number of nucleotides inserted or deleted during V(D)J recombination (Fig. S6). We conclude that unproductive rearrangements modestly contribute to *cis*-exclusion of IgM, and that the primary repertoire of A150 mice is unlikely to be of fetal origin.

### **References associated with Supplementary Results.**

1. **Melchers F.** 2005. The pre-B-cell receptor: selector of fitting immunoglobulin heavy chains for the B-cell repertoire. *Nat Rev Immunol* **5**:578-584.

2. **Herzog S, Reth M, Jumaa H.** 2009. Regulation of B-cell proliferation and differentiation by pre-B-cell receptor signalling. *Nat Rev Immunol* **9**:195-205.
3. **Waisman A, Kraus M, Seagal J, Ghosh S, Melamed D, Song J, Sasaki Y, Classen S, Lutz C, Brombacher F, Nitschke L, Rajewsky K.** 2007. IgG1 B cell receptor signaling is inhibited by CD22 and promotes the development of B cells whose survival is less dependent on Ig alpha/beta. *J Exp Med* **204**:747-758.
4. **Geier JK, Schlissel MS.** 2006. Pre-BCR signals and the control of Ig gene rearrangements. *Semin Immunol* **18**:31-39.
5. **Duchez S, Amin R, Cogné N, Delpy L, Sirac C, Pascal V, Corthésy B, Cogné M.** 2010. Premature replacement of mu with alpha immunoglobulin chains impairs lymphopoiesis and mucosal homing but promotes plasma cell maturation. *Proc Natl Acad Sci USA* **107**:3064-3069.
6. **Aluvihare VR, Khamlichi AA, Williams GT, Adorini L, Neuberger MS.** 1997. Acceleration of intracellular targeting of antigen by the B-cell antigen receptor: importance depends on the nature of the antigen-antibody interaction. *EMBO J* **16**:3553-3562.
7. **Sonoda E, Pewzner-Jung Y, Schwers S, Taki S, Jung S, Eilat D, Rajewsky K.** 1997. B cell development under the condition of allelic inclusion. *Immunity* **6**:225-233.
8. **The YM, Neuberger MS.** 1997. The immunoglobulin (Ig)alpha and Igbeta cytoplasmic domains are independently sufficient to signal B cell maturation and activation in transgenic mice. *J Exp Med* **185**:1753-1758.
9. **Edry E, Azulay-Debby H, Melamed D.** 2008. TOLL-like receptor ligands stimulate aberrant class switch recombination in early B cell precursors. *Int Immunol* **20**:1575-1585.
10. **Han JH, Akira S, Calame K, Beutler B, Selsing E, Imanishi-Kari T.** 2007. Class switch recombination and somatic hypermutation in early mouse B cells are mediated by B cell and Toll-like receptors. *Immunity* **27**:64-75.



11. **Alt FW, Rosenberg N, Casanova RJ, Thomas E, Baltimore D.** 1982. Immunoglobulin heavy-chain expression and class switching in a murine leukaemia cell line. *Nature* **296**:325-331.
12. **Burrows PD, Beck-Engeser GB, Wabl MR.** 1983. Immunoglobulin heavy-chain class switching in a pre-B cell line is accompanied by DNA rearrangement. *Nature* **306**:243-246.
13. **ten Boekel E, Melchers F, Rolink AG.** 1998. Precursor B cells showing H chain allelic inclusion display allelic exclusion at the level of pre-B cell receptor surface expression. *Immunity* **8**:199-207.
14. **Li YS, Hayakawa K, Hardy RR.** 1993. The regulated expression of B lineage associated genes during B cell differentiation in bone marrow and fetal liver. *J Exp Med* **178**:951-960.

## Supplementary Figure Legends

### Figure S1. Replacement of I $\gamma$ 3 region by a pre-rearranged V(D)J-E $\mu$ cassette.

(A) Structure of the targeted  $\gamma$ 3 locus (not to scale): scheme of a WT allele showing an un-rearranged *IgH* locus, and highlighting the E $\mu$  enhancer, the I $\gamma$ 3 GL promoter, S $\gamma$ 3, C $\gamma$ 3 and the 3'RR lying at ~150 kb downstream of the  $\gamma$ 3 region. (B) The structure of the targeting construct is shown. The *neo<sup>r</sup>*-PVH-V(D)J-E $\mu$  cassette was inserted into the ClaI site that replaced PmeI and SphI respectively. The two *loxP* sites are shown as triangles. The homologous recombination event leads to the replacement of the whole I $\gamma$ 3 region. Ig sequences in the targeting vector and the recombinant ES clones are derived from the 129Sv1 mouse strain. (C) The structure of the floxed allele is shown as well as the position of the external 5' probe and the internal 3' probe. B: BamHI, C: ClaI, R: EcoRI, H: HindIII, P: PmeI, S: SphI, X: XhoI. (D) A Southern blot analysis of genomic DNA from WT and A150 mice. The digests used are indicated. The position of the probes is shown in (C).

### Figure S2. FACS Analysis of B cell populations and Ig expression in B cell compartments.

(A). **Total B cell populations.** After removal of red blood cells, cells from the BM, spleen, PPs, peritoneum, and FL, were stained with anti-B220. Representative profiles from each compartment in WT and A150 mice are shown. Right panels: the histograms show the standard deviations. BM, n=5, p=0.0005; Spleen, n=6, p=0.0006; PPs, n=2, p=0.1; Peritoneum, n=2, p=0.02; FL, n=2, p=0.2 (pools of 3 embryos, each from a pregnant mouse (day 19 *p.c.*), were used).

(B-F). **IgH expression in B cell compartments.** Single-cell suspensions from the BM (B), spleen (C), FL (D), PPs (E), and peritoneum (F), derived from WT and 150 mice, were labelled with anti-B220, anti-IgM and/or anti-IgG3, and gated on B220<sup>+</sup> population. Representative dot plots showing essentially the absence of IgM- and the presence of IgG3-surface expression on A150 B cells are

shown, with the corresponding B cell compartments. BM,  $n \geq 5$ ; Spleen,  $n \geq 4$ ; FL,  $n=2$  (pools of 3 embryos at day 19 *p.c* from 2 pregnant mice were used), PPs,  $n=2$ ; Peritoneum,  $n=2$ .

**(G, H). B cell subsets in the BM.** **(G)** Single-cell suspensions from the BM of WT and A150 mice were stained with anti-B220 and anti-CD43. Representative plots and the corresponding histograms are shown on the right ( $n \geq 3$ ). **(H)**. Single-cell suspensions from the BM of WT and A150 mice were stained with anti-B220, anti-AA4.1, and anti- $\kappa$ , and gated on B220<sup>+</sup> population. Representative plots are shown on the left, and the corresponding histograms are shown on the right ( $n=3$ ). (\*\*\*,  $p < 0.001$ ; \*\*,  $p < 0.01$ ; \*,  $p < 0.05$ ; Data are presented  $\pm$  SEM).

**(I, J). IgH expression in the spleen.** **(I)** After removal of red blood cells, single-cell suspensions were stained with anti-B220, and anti-IgM, or anti-IgD, or anti-IgG3. The histograms on the right panels show the standard deviations ( $n=5$ ,  $p < 0.0001$  for IgM<sup>+</sup> cells;  $n=2$ ,  $p < 0.0001$  for IgD<sup>+</sup> cells;  $n=5$ ,  $p < 0.0001$  for IgG3<sup>+</sup> cells). **(J)** To check for the ratio of MZ/FO B cells, splenic cells were stained with anti-B220, anti-CD21 and anti-CD23. Representative profiles, gated on B220<sup>+</sup> population, are shown in the left panels ( $n=2$ ,  $p=0.001$  for MZ and  $p=0.02$  for FO B cells).

**(K, L). B cell populations in the peritoneum and fetal liver.** **(K)** Peritoneal cells were stained with anti-B220 and anti-CD43 (upper plots), with anti-B220 and anti-CD5 (middle plots), or with anti-CD5 and anti-IgM, or anti-IgG3 (lower plots). The B-1a population was defined as B220<sup>+</sup>CD5<sup>+</sup>CD43<sup>high</sup>, B-1b population as B220<sup>+</sup>CD5<sup>low</sup>CD43<sup>low</sup>, and B-2 population as B220<sup>+</sup>CD5<sup>-</sup>CD43<sup>-</sup>. Right panels: the histograms show the standard deviations ( $n=2$ ,  $p=0.0005$  for B-2 cells;  $p=0.002$  for IgM<sup>+</sup> B-1a cells, and  $p=0.01$  for IgG3<sup>+</sup> B-1a cells). **(L)** After removal of red blood cells, cells from the FL were stained with anti-B220 and anti-CD5. Representative profiles from WT and A150 mice are shown. Right panels: the histograms show the standard deviations.  $n=2$ ,  $p=0.2$  (pools of 3 embryos, each from a pregnant mouse (day 19 *p.c*), were used).

**(M). Analysis of surface expression of light chains in the spleen.** After removal of red blood cells, splenocytes with the indicated genotypes were stained with anti-B220 and anti- $\kappa$  and anti- $\lambda$ , and gated on B220<sup>+</sup> population. Representative plots are shown (n=2).

**(N). Flow cytometric analyses of allelic exclusion, allelic inclusion and isotypic competition.**

**(Upper panels)** Single-cell suspensions from the spleens of mice with the indicated genotypes were stained with anti-B220 and mAbs against IgM<sup>a</sup> and IgM<sup>b</sup> allotypes, and gated on B220<sup>+</sup> population. Representative plots are shown (n=5). **(Lower panels)** Cells from the spleens of mice with the indicated genotypes were stained with anti-B220, anti-IgM and anti-IgG3, and gated on B220<sup>+</sup> population. Representative plots are shown (n=4).

**Figure S3. PCR analysis of deletion events on the A150 allele in A150/WT mice.**

**(A).** IgM<sup>+</sup>-only and IgG3<sup>+</sup>-only expressing B cells were sorted from the BM of A150/WT mice, and their genomic DNAs were extracted and subjected to PCR using appropriate primers. The relative localisation of the primers is indicated on the right of the corresponding panels. Genomic DNAs from WT and A150/A150 pre-B cells were used as controls. Representative results are shown with, below, the corresponding histograms (n=2, p=0.008 for I $\mu$ F-3'SpeIR, p=0.76 for I $\gamma$ 3F-3'SphIR, p=0.06 for I $\mu$ F-3'SphIR, p=0.7 for 5'PmeIF-3'PmeIR, p<0.0001 for 5'PmeI-3'PmeIR, p<0.0001 for VDJ<sub>A150F-5'J<sub>H</sub>3R</sub>). **(B).** DC-PCR analysis of CSR events in IgM<sup>+</sup> and IgG3<sup>+</sup> populations. Genomic DNAs were extracted from the sorted BM populations, digested with EcoRI, and subjected to DC-PCR. The relative position of the primers is indicated in the top scheme. As a control, genomic DNA from a serial dilution of splenic B cells induced to switch to IgG3 was assayed by using the same primers. The percentage of switched B cells was determined by FACS (n=2). **(C).** Detection of ectopic V(D)J recombination. Genomic DNAs from the sorted populations were assayed for D-J<sub>H</sub> recombination by using a forward primer (top scheme) that binds RSSs of

the vast majority of D segments and a backward primer that binds upstream of both the endogenous and the ectopic J<sub>H3</sub> (n=2, p<0.0001).

**Figure S4. Possible configurations of A150 and WT alleles and expected transcripts in IgM<sup>b+</sup> and IgG3<sup>+</sup> populations.**

The A150 and WT alleles in their un-rearranged configuration are shown on the top. For simplicity, a single V<sub>H</sub>, D or J<sub>H</sub> segment is shown. Possible V<sub>H</sub>-DJ<sub>H</sub> rearrangements in IgM<sup>b+</sup> and IgG3<sup>+</sup> populations and the corresponding transcripts are indicated. The transcripts that potentially produce μ or γ3 heavy chains are underlined. Assumptions underlying some configurations and the likely order of rearrangements are reported below each scheme (see paragraph 4 of Supplementary results for more details).

**Figure S5. Sequences of the VDJ-Cγ3 cDNAs from sorted IgM<sup>b+</sup> and IgG3<sup>+</sup> A150/WT bone marrow B cells.**

IgM<sup>b+</sup>-only and IgG3<sup>+</sup>-only expressing B cells were sorted from the bone marrow of A150/WT mice. Total RNAs were extracted and reverse transcribed. Single-stranded cDNAs were subjected to PCR using a primer that binds either the proximal V<sub>H7183</sub>, or the distal V<sub>HJ558</sub> gene segment family, and a reverse primer that binds Cγ3-1 exon. Non-productive sequences are further divided into those with out-of-frame rearrangements, and those with premature stop codons (underlined) within the rearranged D-J<sub>H</sub> sequences. The correct reading-frame resulting from J<sub>H3</sub>-Cγ3 or J<sub>H4</sub>-Cγ3 splicing is shown below the alignments. The Cγ3-1 exon sequence is indicated in bold.

**Figure S6. Sequences of the V<sub>H</sub>-D-J<sub>H4</sub> junctions from WT and A150/A150 pro-B cells.**

The sequences were amplified by using a primer that binds the proximal V<sub>H7183</sub> gene-family segments, and one primer that binds 3' of J<sub>H4</sub> segment. The junctional diversity was used to check

for the clonality of the sequences. 38 and 43 sequences were obtained from sorted WT and A150 pro-B cells respectively. Non-productive sequences are further divided in those with out-of-frame rearrangements, and those with premature stop codons (in italics).

## Supplementary Materials and Methods

**Gene targeting.** For A150 targeting construct, a ~2.6 kb *PmeI*-*SphI* fragment spanning *I $\gamma$ 3* promoter/exon, and ending at ~250 bp downstream of the *I $\gamma$ 3* exon was replaced by a ~5 kb fragment containing a pre-rearranged V(D)J gene and E $\mu$  enhancer. The *PmeI* and *SphI* sites were first modified into *ClaI* site in a pBluescript II KS<sup>-</sup> (Stratagene) vector containing a ~8 kb *XhoI*-*BamHI* fragment spanning *I $\gamma$ 3* and *S $\gamma$ 3* sequences. The P<sub>VH</sub>-V(D)J-E $\mu$  sequence was derived from pYMT8 (1) as a *SpeI* fragment and cloned into the unique *SpeI* site of a vector downstream of a *neo<sup>r</sup>* cassette flanked by two *loxP* sites. The HSV *tk* gene was inserted into *XhoI* site. The ES cell line CK35 (129Sv1) (kindly provided by C. Kress, Institut Pasteur, Paris) was transfected by electroporation, and selected using G418 (300  $\mu$ g/ml) and gancyclovir (2  $\mu$ M). Recombinant clones were identified by PCR and Southern blot analysis after an *EcoRI* digest, with an external 5' probe (a 1.0 kb *EcoRI*-*XhoI* fragment), or after a *BamHI* digest, with an internal 3' probe (a 2 kb *HindIII*-*BamHI* fragment downstream of *S $\gamma$ 3* region). Two ES clones showing homologous recombination were injected into C57Bl/6 blastocysts, the male chimeras were then mated with C57Bl/6 females. Germ-line transmission of the mutation was checked by PCR and Southern blot after *EcoRI* or *BamHI* digests and using the external or internal probes. Homozygous N/N mutant mice were mated with EIIa-cre transgenic mice. The progeny was checked by PCR and Southern blot for *Cre*-mediated deletion *neo<sup>r</sup>* by using the same digests and probes. Additional checks were made by sequencing pertinent regions in the genomic DNA of splenic B cells from *neo<sup>r</sup>*-deleted mice.

**Flow cytometry analyses.** Lymphoid organs from 6- to 8-week-old mice were prepared by standard techniques. After disaggregation, washing, and removal of red blood cells, 5x10<sup>5</sup> cells/assay were stained and gated as indicated in the figure legends. Fetal livers were pooled from embryos at day 19 *post-coitum*, and treated as above. Data were obtained on 2.0 x 10<sup>4</sup> viable cells

by using a BD FACSCalibur. In all FACS acquisitions, dead cells were excluded by labelling with propidium iodide.

**Antibodies.** PE-conjugated anti-IgM<sup>b</sup>, FITC-conjugated anti-IgM<sup>a</sup>, FITC-conjugated anti-IgG3, PE- and FITC-conjugated anti-CD43, PE-conjugated anti- $\kappa$ , FITC-conjugated anti- $\lambda$ , PE-conjugated anti-CD5, PE-conjugated anti-CD4, FITC-conjugated anti-CD8, PE-conjugated anti-AA4.1, FITC-conjugated anti- $\kappa$ , were purchased from BD-Pharmingen. PE- and APC-conjugated anti-B220, FITC- and PE-conjugated anti-IgM, APC-conjugated anti-CD21, FITC-conjugated anti-CD23 were from BioLegend. PE-conjugated anti-IgD was from Southern Biotech.

**Sequencing of V(D)J amplicons.** Genomic DNAs from sorted pro-B cells were amplified by using a degenerate primer that binds the proximal V<sub>H7183</sub> gene segment family and a primer 3' of J<sub>H4</sub>. Bands corresponding to V<sub>H</sub>(D)J<sub>H1</sub> rearrangements were purified and cloned into pCR2.1-TOPO (Invitrogen) for sequencing.

**Sequencing of V(D)J-C $\gamma$ 3 cDNAs.** Single-cell suspensions from the bone marrows of A150/WT mice were stained with anti-B220, anti-IgM<sup>b</sup>, and anti-IgG3. IgM<sup>b+</sup> and IgG3<sup>+</sup> single-expressers were sorted, and total RNAs were extracted and reverse transcribed. PCRs were performed by using a degenerate primer that binds the proximal V<sub>H7183</sub> or the distal V<sub>HJ558</sub> gene segment families, and a reverse primer that binds C $\gamma$ 3-1 exon. Amplicons were purified and cloned into pCR2.1-TOPO (Invitrogen) for sequencing.

**DC-PCR.** Splenic B cells were purified by using CD43-beads (Miltenyi) and cultured in the presence of 20  $\mu$ g/ml LPS (Sigma) and 3 ng/ml anti-IgD-dextran (Fina Biosolutions). At day 4, genomic DNA was extracted and assayed by DC-PCR essentially as described (2).



## **References associated with Supplementary Materials and Methods**

1. **The YM, Neuberger MS.** 1997. The immunoglobulin (Ig)alpha and Igbeta cytoplasmic domains are independently sufficient to signal B cell maturation and activation in transgenic mice. *J Exp Med* **185**:1753-1758.
2. **Chu CC, Paul WE, Max EE.** 1992. Quantitation of immunoglobulin mu-gamma 1 heavy chain switch region recombination by a digestion-circularization polymerase chain reaction method. *Proc Natl Acad Sci USA* **89**:6978-6982.

## Supplementary tables

**Table S1.** Productive versus non-productive rearrangements in sorted A150/WT bone marrow B cells.

| <b>IgM<sup>+</sup><br/>population</b>  | <b>Productive</b> | <b>Non-<br/>productive</b> | <b>Number of<br/>sequences</b> | <b>J<sub>H3</sub><br/>usage</b> | <b>J<sub>H4</sub><br/>usage</b> |
|----------------------------------------|-------------------|----------------------------|--------------------------------|---------------------------------|---------------------------------|
| Proximal V <sub>H</sub>                | 17 (40%)          | 25 (60%)                   | 42 (100%)                      | 13                              | 29                              |
| Distal V <sub>H</sub>                  | 9 (24%)           | 29 (76%)                   | 38 (100%)                      | 18                              | 20                              |
| <b>IgG3<sup>+</sup><br/>population</b> | <b>Productive</b> | <b>Non-<br/>productive</b> | <b>Number of<br/>sequences</b> | <b>J<sub>H3</sub><br/>usage</b> | <b>J<sub>H4</sub><br/>usage</b> |
| Proximal V <sub>H</sub>                | 40 (95%)          | 2 (5%)                     | 42 (100%)                      | 12                              | 30                              |
| Distal V <sub>H</sub>                  | 42 (98%)          | 1 (2%)                     | 43 (100%)                      | 5                               | 38                              |

**Ratios of productive/non-productive proximal and distal VDJ-C $\gamma$ 3 cDNA sequences in sorted IgM<sup>+</sup> and IgG3<sup>+</sup> heterozygous B cells from A150/WT mice.** IgM<sup>+</sup>-only and IgG3<sup>+</sup>-only cells were sorted from the bone marrow of A150/WT mice. Total RNAs were extracted, reverse transcribed and subjected to PCR using a primer that binds either the proximal V<sub>H7183</sub>, or the distal V<sub>H1558</sub> gene segment family, and a reverse primer that binds 5' of C $\gamma$ 3.

**Table S2.** Amplified joints ( $V_{H7183}DJ_{H4}$ ) from sorted pro-B cells.

| <b>Genotype</b> | <b>In frame sequences</b> | <b>Out of frame sequences</b> | <b>Total number of sequences</b> |
|-----------------|---------------------------|-------------------------------|----------------------------------|
| WT              | 21 ( <b>55%</b> )         | 17 ( <b>45%</b> )             | 38 ( <b>100%</b> )               |
| A150/A150       | 17 ( <b>39%</b> )         | 26 ( <b>61%</b> )             | 43 ( <b>100%</b> )               |

**Ratios of productive/non-productive proximal  $V_H$ -D- $J_H$  rearrangements in sorted pro-B cells from WT and homozygous A150 mice.** Genomic DNAs were prepared from sorted pro-B cells and subjected to PCR using a degenerate primer that binds the proximal  $V_{H7183}$  genes family and a primer that binds 3' of  $J_{H4}$  segment.

**Table S3.** *Oligonucleotides used in this study.*

| <b>Primer</b>                                             | <b>Sequence (5' to 3')</b>        | <b>Tm (°C)</b> | <b>Reference</b>             |
|-----------------------------------------------------------|-----------------------------------|----------------|------------------------------|
| <i>V(D)J rearrangement assays :</i>                       |                                   |                |                              |
| D <sub>H</sub> Q52-Fw                                     | CCACAGGCTCGAGAACTTTAGCG           | 60             | Perlot <i>et al.</i> (2005)  |
| D <sub>H</sub> L-Fw                                       | TTTTTGTC AAGGGATCTACTACTGTG       | 60             | Perlot <i>et al.</i> (2005)  |
| V <sub>H</sub> 7183-Fw                                    | GCGAAGCTTGTGGAGTCTGGGGGAGGCTTA    | 63             | Perlot <i>et al.</i> (2005)  |
| V <sub>H</sub> Q52-Fw                                     | GCGAAGCTTCTCACAGAGCCTGTCCATCAC    | 60             | Perlot <i>et al.</i> (2005)  |
| V <sub>H</sub> Gam3.8                                     | CAAGGGACGGTTTGCCTTCTCTTTGGAA      | 60             | Fuxa <i>et al.</i> (2004)    |
| V <sub>H</sub> J558                                       | GCGAAGCTTARGCCTGGGRCTTCAGTGAAG    | 60             | Perlot <i>et al.</i> (2005)  |
| J <sub>H</sub> 4-Rev                                      | CCTAAAGGCTCTGAGATCCCTAGACAG       | 60-63          | Puget <i>et al.</i> (2014)   |
| V <sub>K</sub> DEG-Fw                                     | GGCTGCAGSTTCAGTGGCAGTGGRTCWGGGRAC | 60             | Dudley <i>et al.</i> (2003)  |
| J <sub>K</sub> 5.1-Rev                                    | GAAGTACTTTAACTCCTAACATGAAAACC     | 60             | Dudley <i>et al.</i> (2003)  |
| HS4-Fw                                                    | CCAAAAATGGCCAGGCCTAGG             | 60             | Perlot <i>et al.</i> (2005)  |
| HS4-Rev                                                   | AGGTCTACACAGGGGCTCTG              | 60             | Perlot <i>et al.</i> (2005)  |
| <i>Transcription Analysis / Q-PCR and RT-PCR assays :</i> |                                   |                |                              |
| μ0-Fw                                                     | GGTGAGTCCTGCATCTGGGG              | 60             | This study                   |
| I <sub>μ</sub> -Fw                                        | CTCTGGCCCTGCTTATTGTTG             | 60             | Haddad <i>et al.</i> (2011)  |
| C <sub>μ</sub> -Rev                                       | GAAGACATTTGGGAAGGACTGACT          | 60-62          | Haddad <i>et al.</i> (2011)  |
| I <sub>γ</sub> 3-Fw                                       | TGGGCAAGTGGATCTGAACAC             | 60             | Haddad <i>et al.</i> (2011)  |
| C <sub>γ</sub> 3-Rev                                      | CTCAGGGAAGTAGCCTTTGACA            | 60-62          | Haddad <i>et al.</i> (2011)  |
| VDJ <sub>A150</sub> -Fw                                   | CCAGAGAGAGAGATTATAGGCTTGACTAC     | 60             | This study                   |
| AS <sub>DSP</sub> -Fw                                     | ACTTGGCAGGGATTTTTGTC              | 60             | Guo <i>et al.</i> (2011)     |
| AS <sub>DSP</sub> -Rev                                    | TGAAGAGTCTGCTGGGCATA              | 60             | Guo <i>et al.</i> (2011)     |
| pV <sub>H</sub> 7183 GLT-Fw                               | ATGGACTTCGGGCTCAGCTTG             | 60             | Guo <i>et al.</i> (2011)     |
| pV <sub>H</sub> 7183 GLT-Rev                              | GATGCTCTGCAGGAGGTTTT              | 60             | Guo <i>et al.</i> (2011)     |
| dV <sub>H</sub> J558 GLT-Fw                               | ATGGGATGGAGCTGGATCTT              | 60             | Guo <i>et al.</i> (2011)     |
| dV <sub>H</sub> J558 GLT-Rev                              | CTCAGGATGTGGTTACAACACTGTG         | 60             | Perlot <i>et al.</i> (2005)  |
| AS J558 5'int-Fw                                          | ATTCCCCTCCCAATAGGAAA              | 60             | Bolland <i>et al.</i> (2004) |
| AS J558 5'int-Rev                                         | TGTCAATCACAATGGGCATC              | 60             | Bolland <i>et al.</i> (2004) |
| AS PAIR4-Fw                                               | ATGGGGCACATAGGTTCTTCC             | 64             | Puget <i>et al.</i> (2014)   |
| AS PAIR4-Rev                                              | GGACATCTGAGAGATCATTGAACATC        | 64             | Puget <i>et al.</i> (2014)   |

| Primer                  | Sequence (5' to 3')            | Tm (°C) | Reference                   |
|-------------------------|--------------------------------|---------|-----------------------------|
| L-VDJ <sub>H</sub> -Fw  | GCAACAGCTACAGGTGTCCACTCCC      | 60      | This study                  |
| pV <sub>H</sub> 7183-Fw | GCGAAGCTTGTGGAGTCTGGGGGAGGCTTA | 60      | Perlot <i>et al.</i> (2005) |
| dV <sub>H</sub> J558-Fw | GCGAAGCTTARGCCTGGGRCTTCAGTGAAG | 60      | Perlot <i>et al.</i> (2005) |
| D <sub>H</sub> F        | TTTTTGTSAAGGGATCTACTACTGTG     | 62      | Puget <i>et al.</i> (2014)  |
| Actin 4-Fw              | CTGACAGACTACCTCATGAAGATCC      | 60      | Puget <i>et al.</i> (2014)  |
| Actin 5-Rev             | CATGGATGCCACAGGATTC            | 60      | Puget <i>et al.</i> (2014)  |
| GAPDH-Fw                | GGTGAAGGTCGGTGTGAACG           | 60/64   | Puget <i>et al.</i> (2014)  |
| GAPDH-Rev               | CTCGCTCCTGGAAGATGGTG           | 60/64   | Puget <i>et al.</i> (2014)  |
| YWHAZ-Fw                | AGATGAAGCAGAAGCAGGAGAAG        | 60/64   | Puget <i>et al.</i> (2014)  |
| YWHAZ-Rev               | CAGCATGGATGACAAATGGTCAC        | 60/64   | Puget <i>et al.</i> (2014)  |

Analysis of deletion events on the A150 allele :

|                       |                                   |       |                             |
|-----------------------|-----------------------------------|-------|-----------------------------|
| I <sub>μ</sub> F      | CTCTGGCCCTGCTTATTGTTG             | 60    | Haddad <i>et al.</i> (2011) |
| 3'SpeI R              | CATGAGCTCTATGATTATTGGTTAACAGGCAAC | 60    | This study                  |
| I <sub>γ</sub> 3 F    | TGGGCAAGTGGATCTGAACAC             | 60    | Haddad <i>et al.</i> (2011) |
| 3'SphI R              | GCTCTCCTGTGGCTGCTCAACTTGG         | 60    | This study                  |
| 5'PmeI F              | AGAAGTGTGTGTGGTCATCAAAGC          | 60    | This study                  |
| 3'PmeI R              | AATTACATACTTTCAGCATTCAATGATACTG   | 60    | This study                  |
| 3'LoxP R              | CTTGGCTGGACGTAACCTCCTC            | 60    | This study                  |
| VDJ <sub>A150</sub> F | CCAGAGAGAGAGATTATAGGCTTGACTAC     | 60    | This study                  |
| D <sub>H</sub> F      | TTTTTGTSAAGGGATCTACTACTGTG        | 62    | Puget <i>et al.</i> (2014)  |
| 5'J <sub>H</sub> 3 R  | CAGATGGAGGCCAGTGAGGG              | 60/62 | This study                  |

DC-PCR assays :

|                             |                                    |    |                          |
|-----------------------------|------------------------------------|----|--------------------------|
| 5'S <sub>μ</sub> R          | CATGAGCTCTATGATTATTGGTTAACAGGCAAC  | 63 | This study               |
| 3'S <sub>γ</sub> 3 F        | TTGTCAATTCTTGATCTTACAGCACAAAGGG    | 63 | This study               |
| Nested 3'S <sub>γ</sub> 3 F | ACTCCCTGGGTGCGAGAATATACAAGCC       | 63 | This study               |
| nAChRe-Fw                   | CGGTCGACAGGCGCGCACTGACACCACTAAG    | 63 | Chu <i>et al.</i> (1992) |
| nAChRe-Rev                  | GCGCCATCGATGGACTGCTGTGGGTTTCACCCAG | 63 | Chu <i>et al.</i> (1992) |

### References associated with Table S3:

**Bolland DJ, Wood AL, Johnston CM, Bunting SF, Morgan G, Chakalova L, Fraser PJ, Corcoran AE.** 2004. Antisense intergenic transcription in V(D)J recombination. *Nat Immunol* **5**:630-637.

**Chu CC, Paul WE, Max EE.** 1992. Quantitation of immunoglobulin mu-gamma 1 heavy chain switch region recombination by a digestion-circularization polymerase chain reaction method. *Proc Natl Acad Sci USA* **89**:6978-6982.

**Dudley DD, Sekiguchi J, Zhu C, Sadofsky MJ, Whitlow S, DeVido J, Monroe RJ, Bassing CH, Alt FW.** 2003. Impaired V(D)J recombination and lymphocyte development in core RAG1-expressing mice. *J Exp Med* **198**:1439-1450.

**Fuxa M, Skok J, Souabni A, Salvagiotto G, Roldan E, Busslinger M.** 2004. Pax5 induces V-to-DJ rearrangements and locus contraction of the immunoglobulin heavy-chain gene. *Genes & Dev* **18**:411-422.

**Guo C, Yoon HS, Franklin A, Jain S, Ebert A, Cheng HL, Hansen E, Despo O, Bossen C, Vettermann C, Bates JG, Richards N, Myers D, Patel H, Gallagher M, Schlissel MS, Murre C, Busslinger M, Giallourakis CC, Alt FW.** 2011. CTCF-binding elements mediate control of V(D)J recombination. *Nature* **477**:424-430.

**Haddad D, Oruc Z, Puget N, Laviolette-Malirat N, Philippe M, Carrion C, Le Bert M, Khamlichi AA.** 2011. Sense transcription through the S region is essential for immunoglobulin class switch recombination. *EMBO J* **30**:1608-1620.

**Perlot T, Alt FW, Bassing CH, Suh H, Pinaud E.** 2005. Elucidation of IgH intronic enhancer functions via germ-line deletion. *Proc Natl Acad Sci USA* **102**:14362-14367.

**Puget N, Hirasawa R, Nguyen Hu NS, Laviolette-Malirat N, Feil R, Khamlichi AA.** 2015. Insertion of an imprinted insulator into the IgH locus reveals developmentally regulated, transcription-dependent control of V(D)J recombination. *Mol Cell Biol* **35**:529-543.

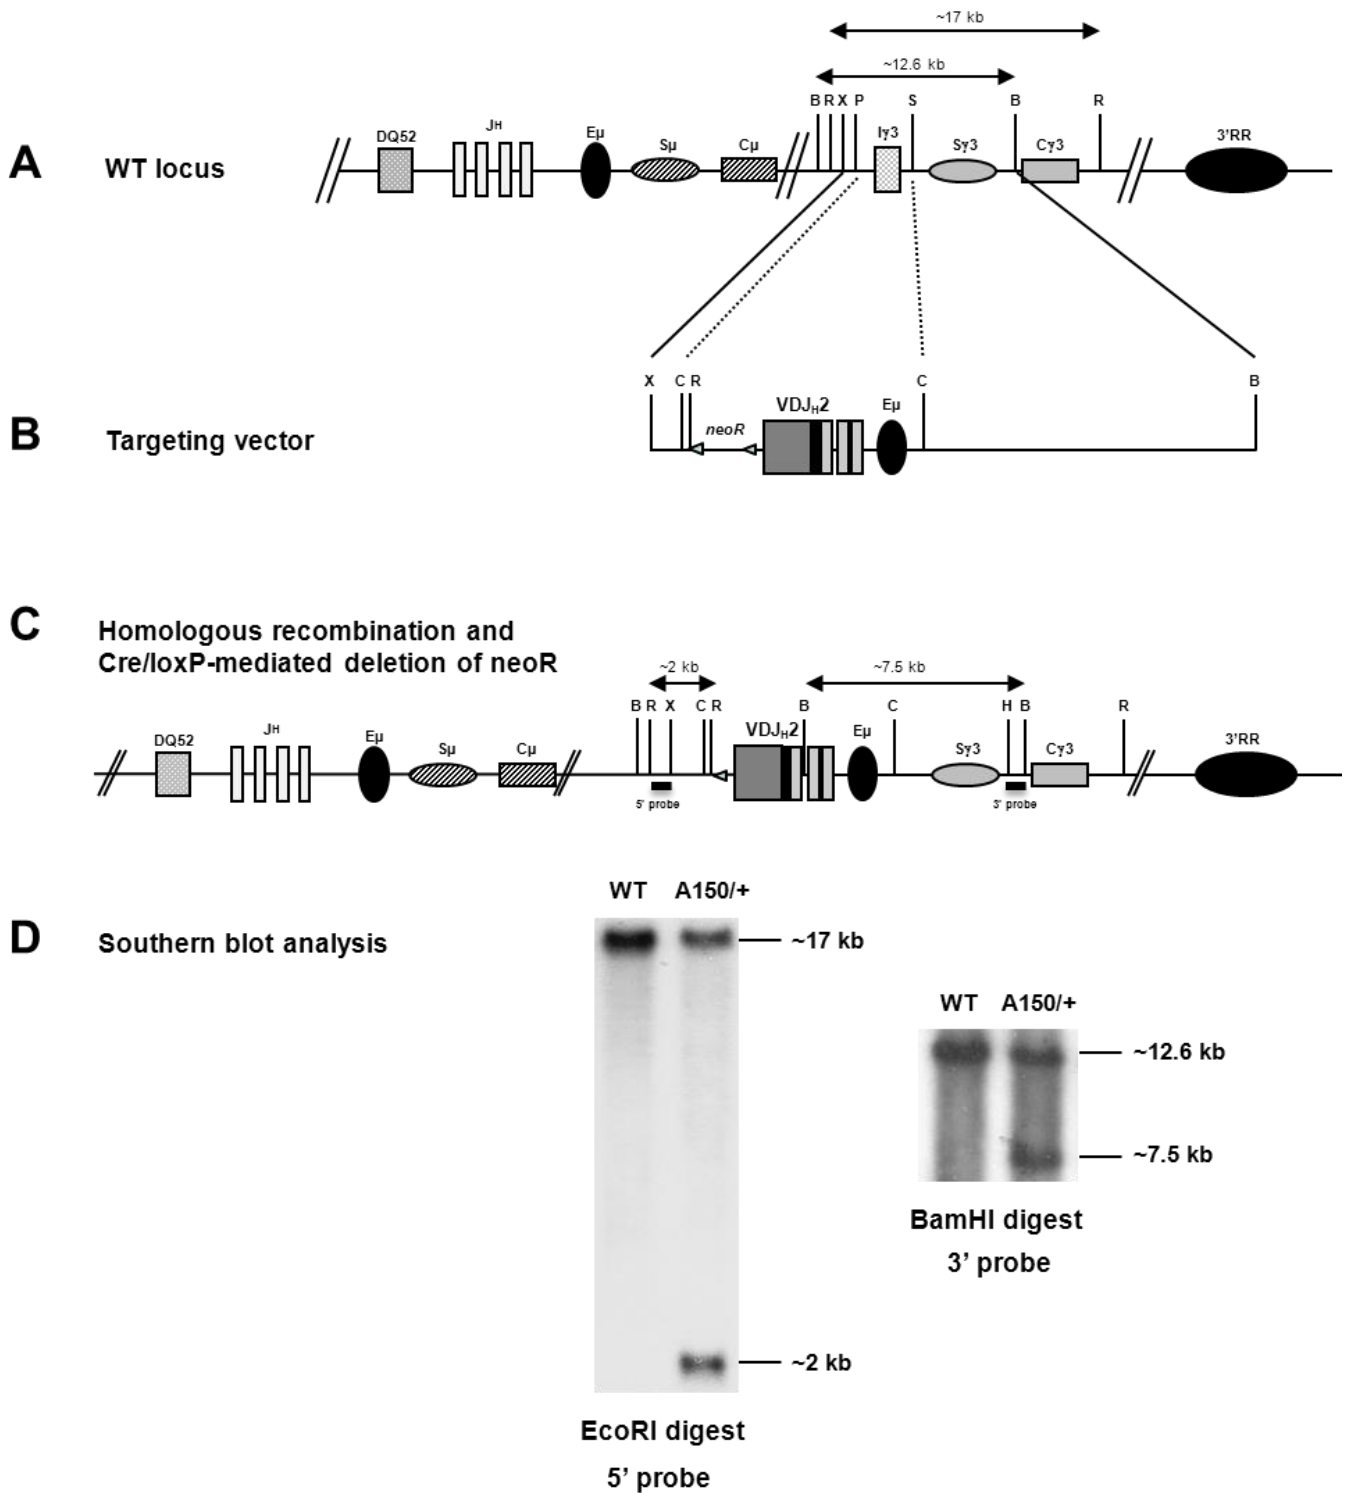

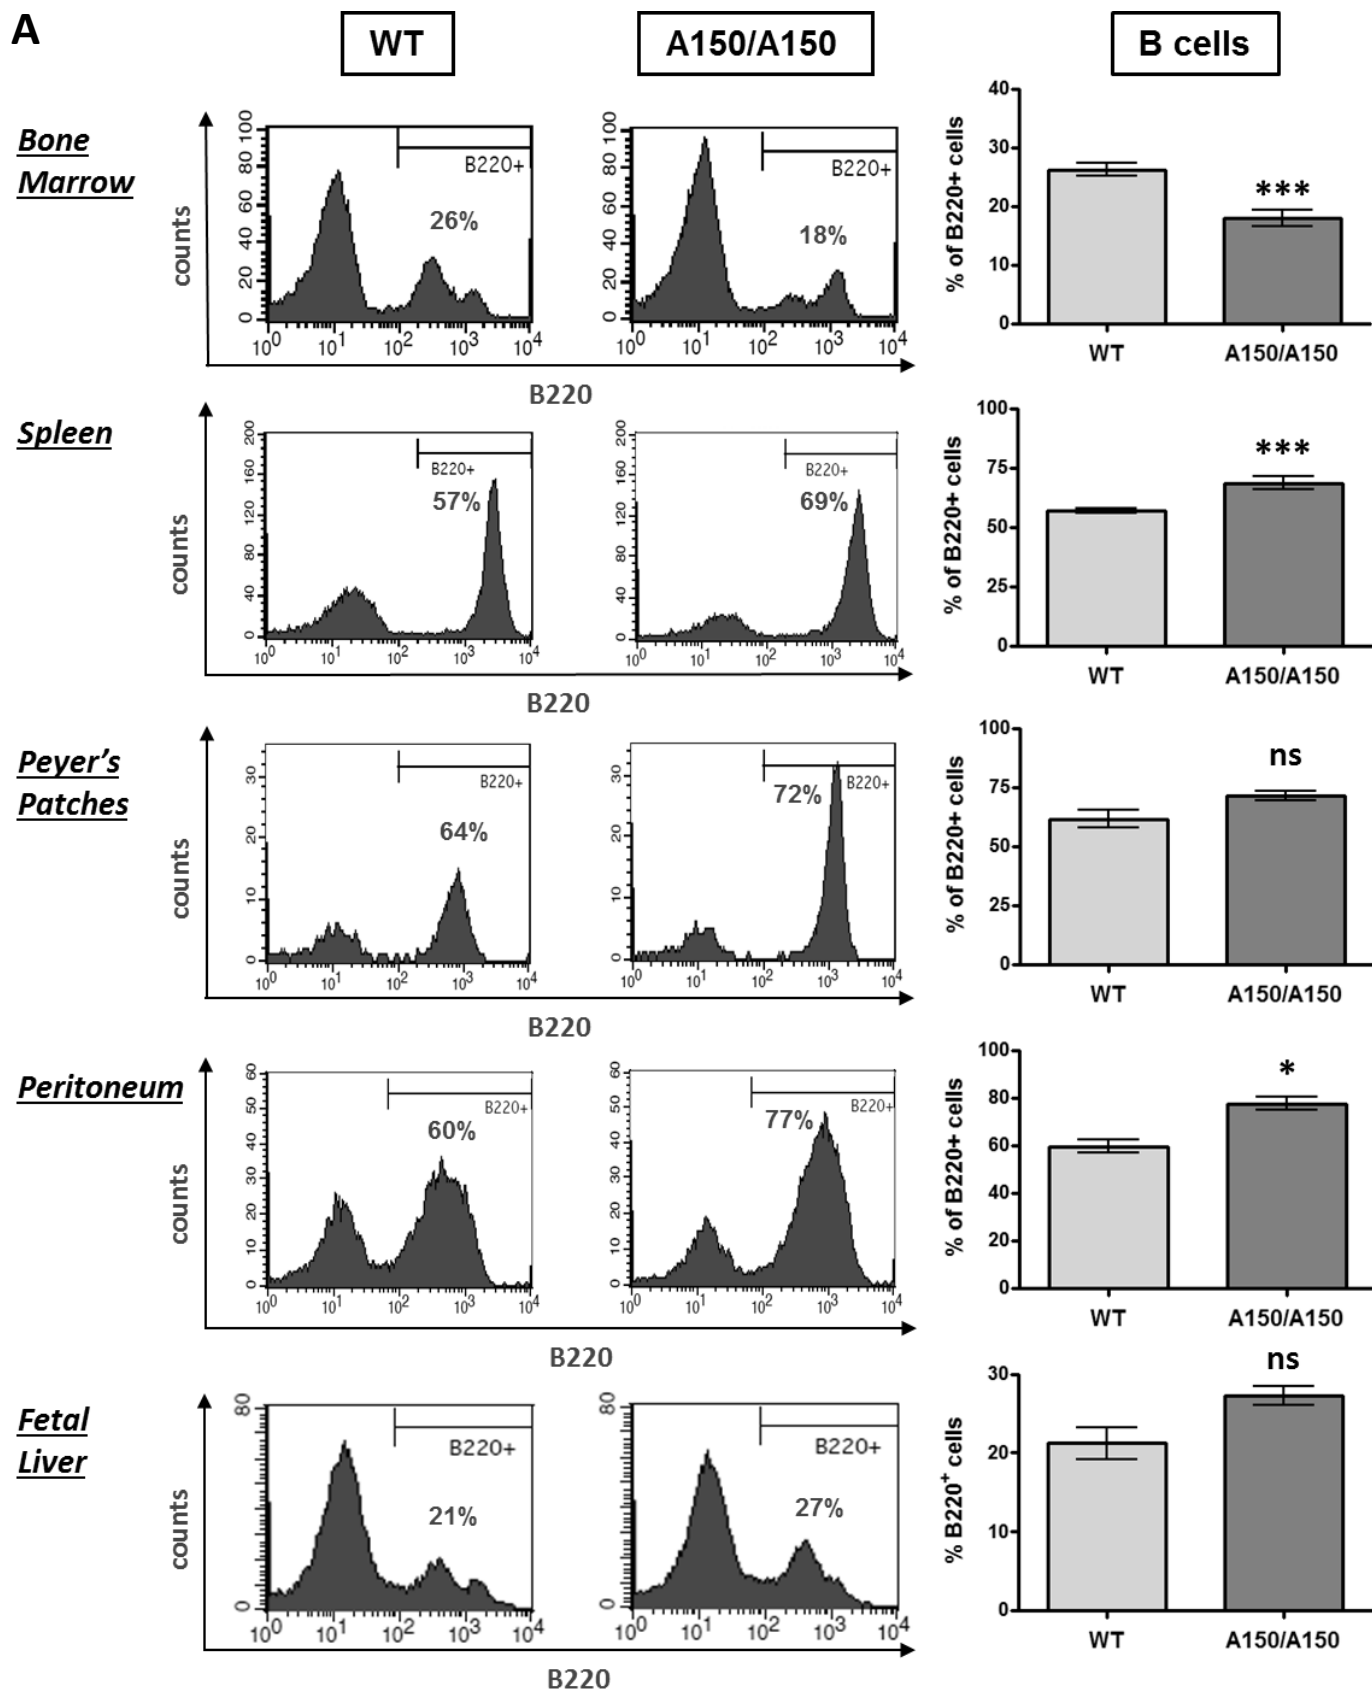



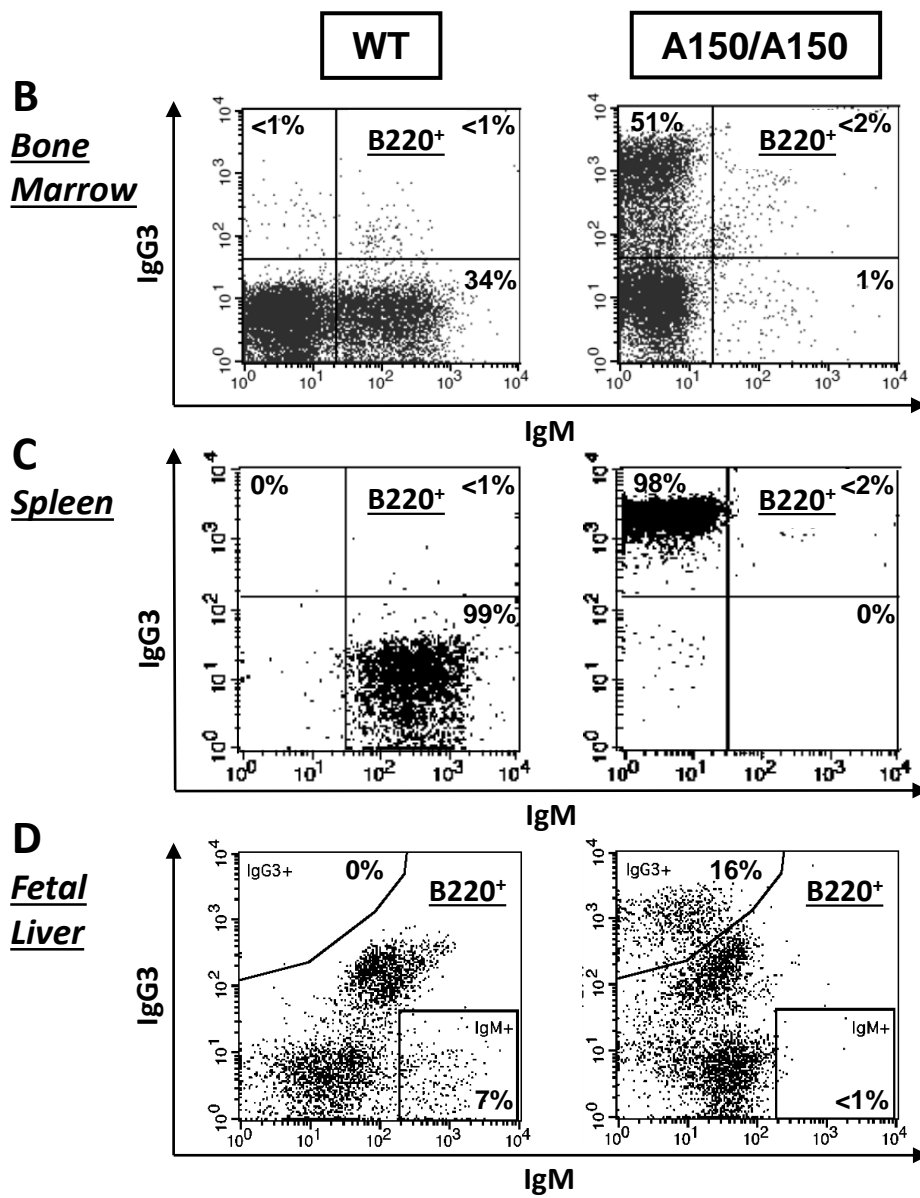

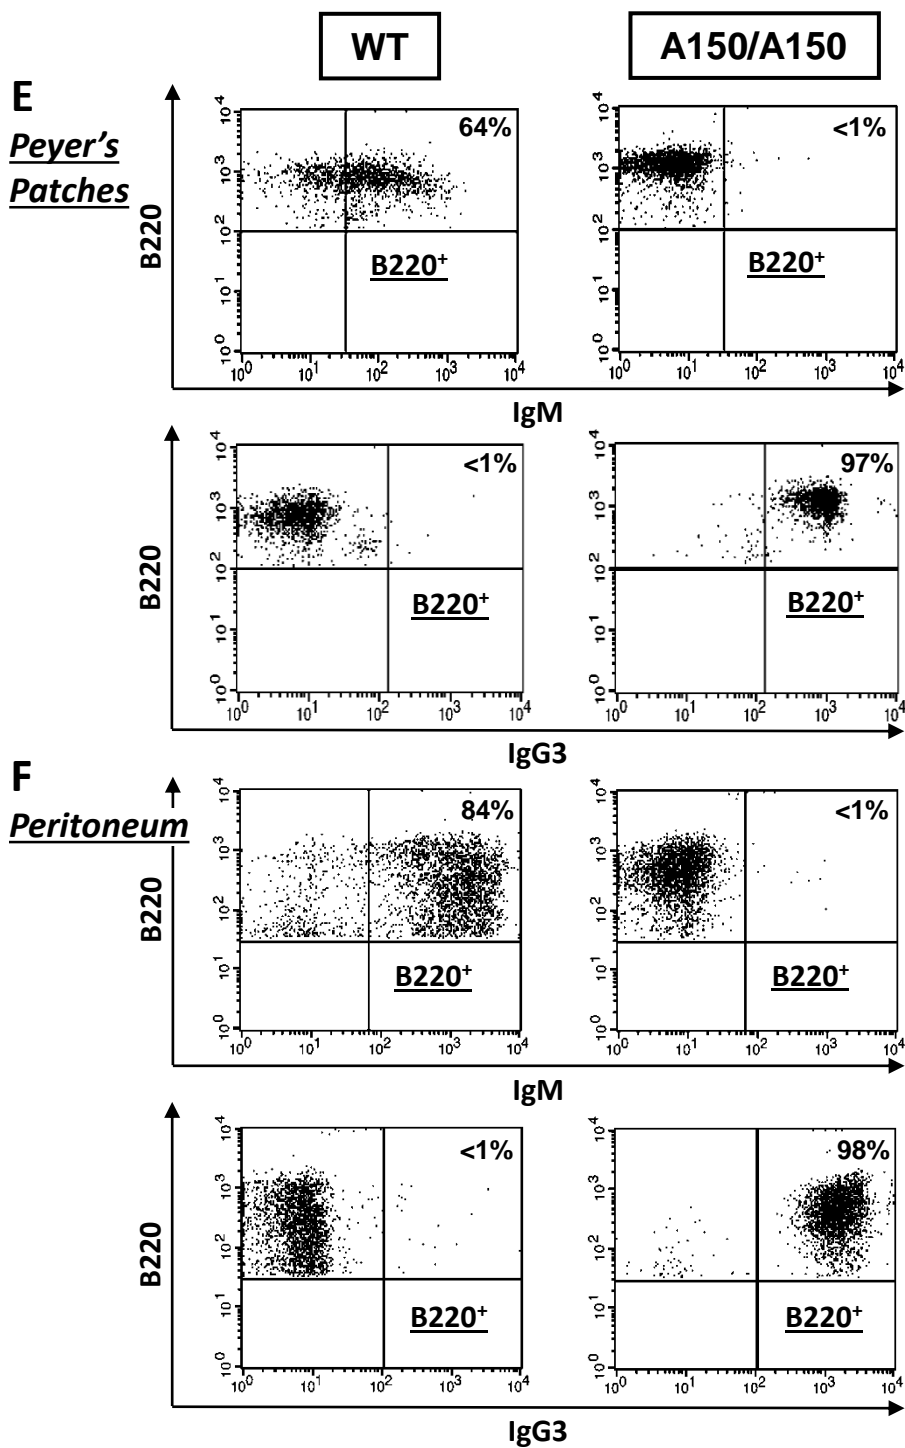

**Bone Marrow**

**G**

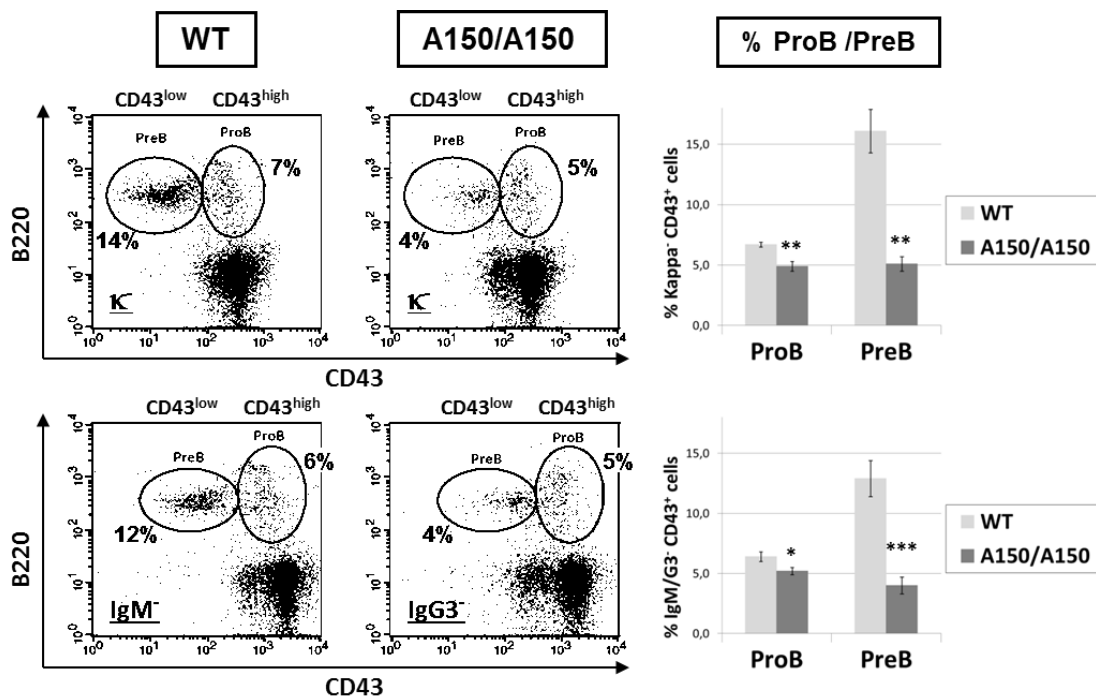

**H**

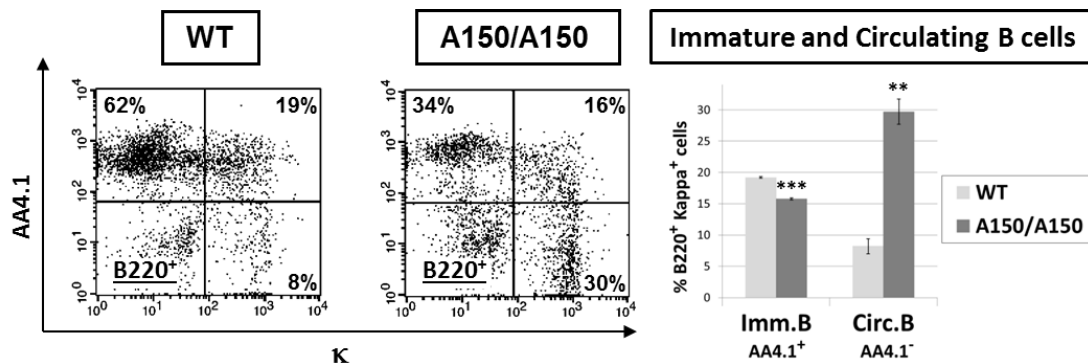

## Spleen

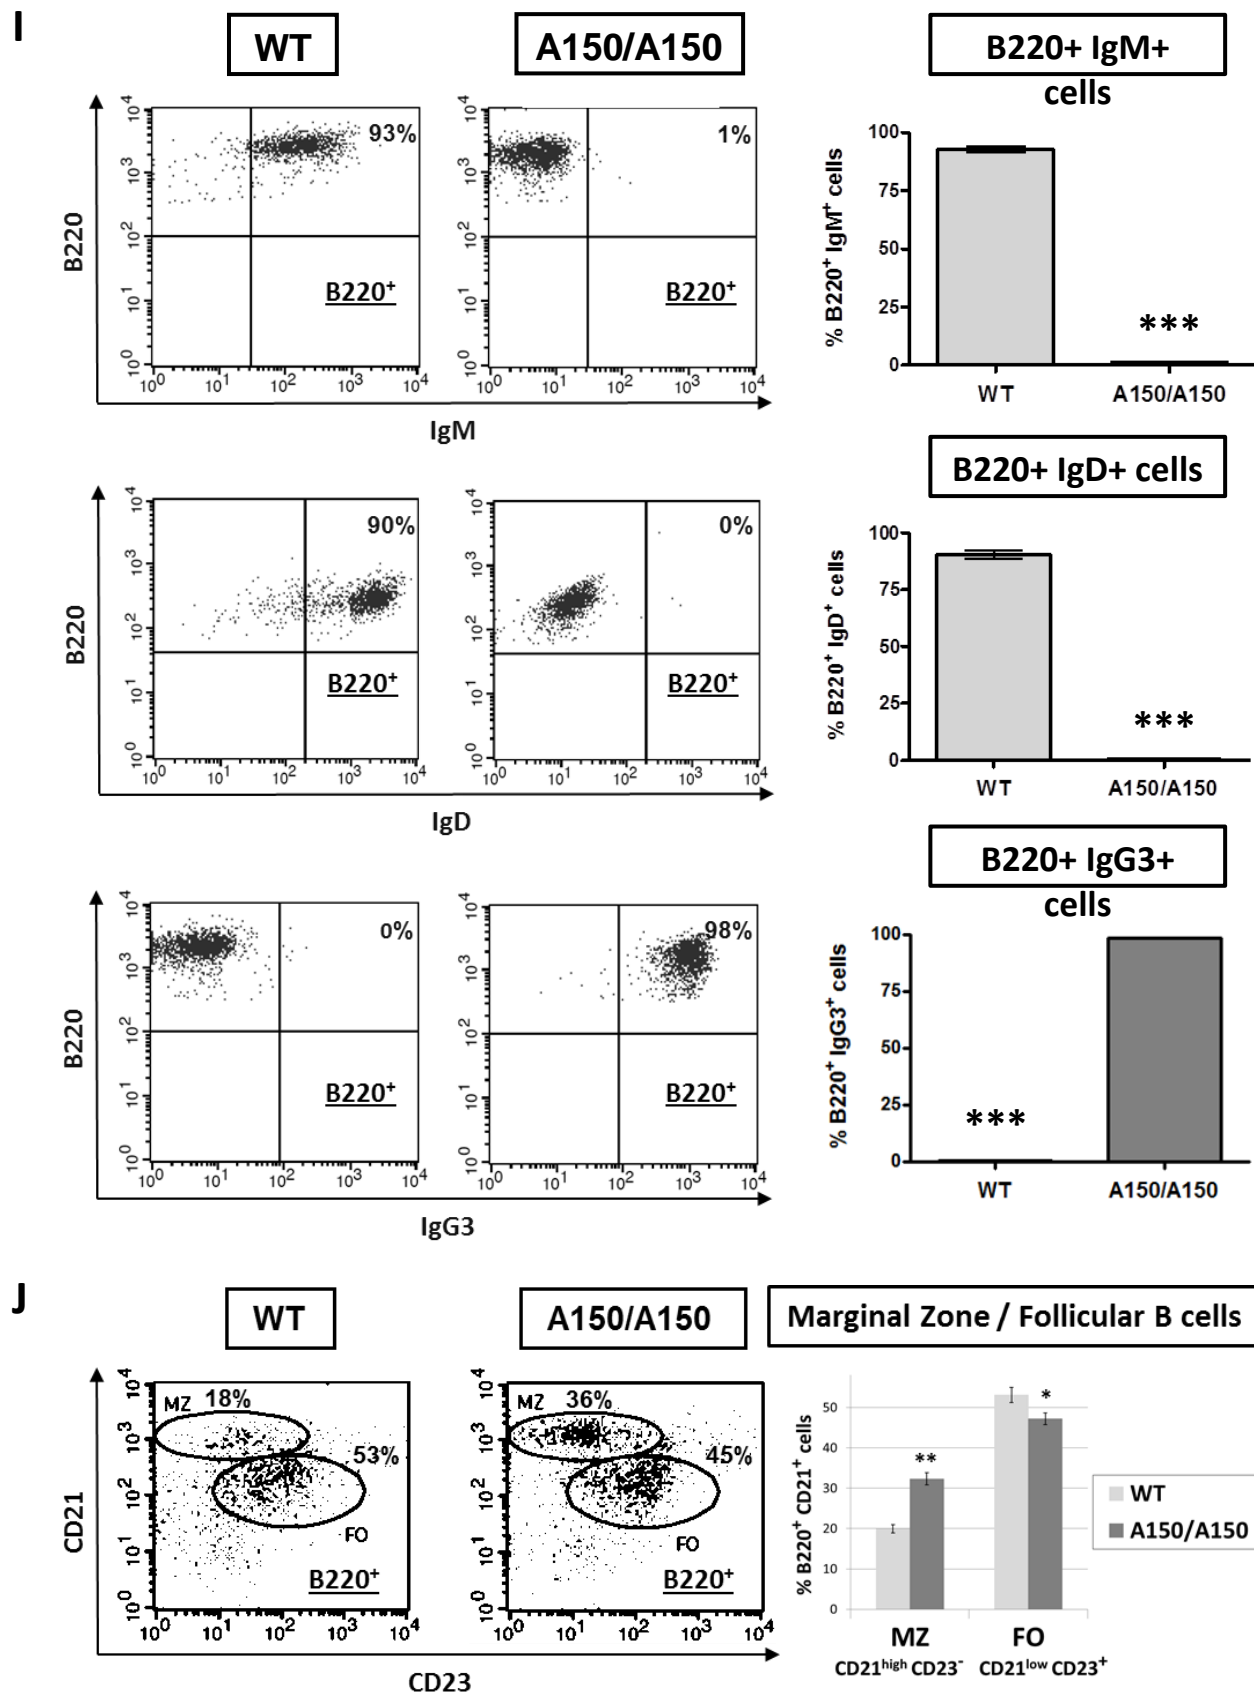

K

Peritoneum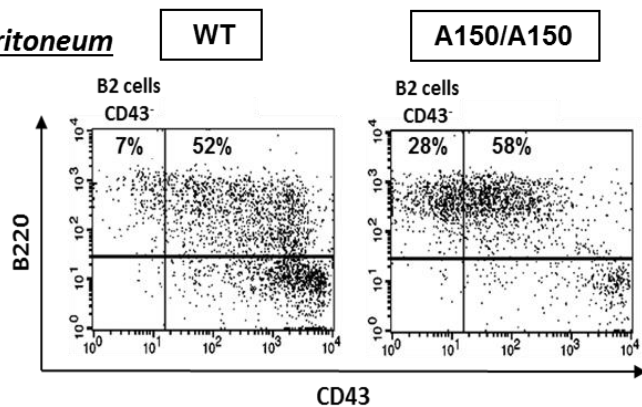

Peritoneum B-2 cells

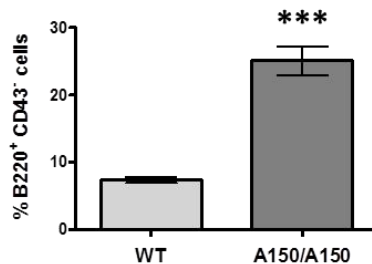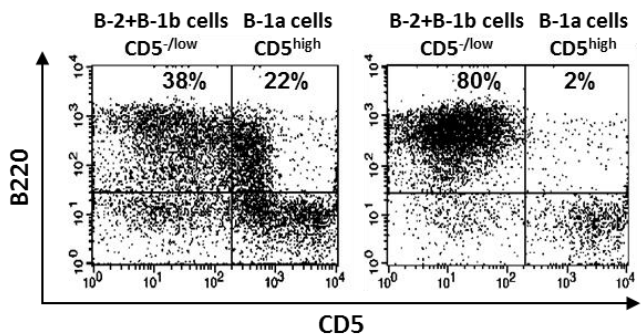

Peritoneum B-1 cells

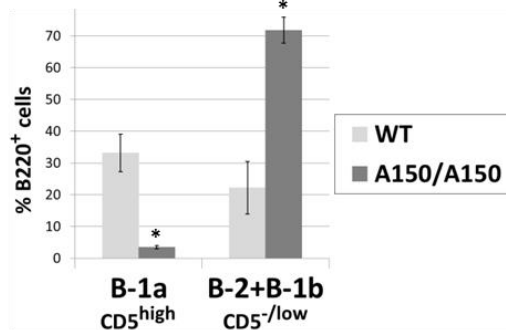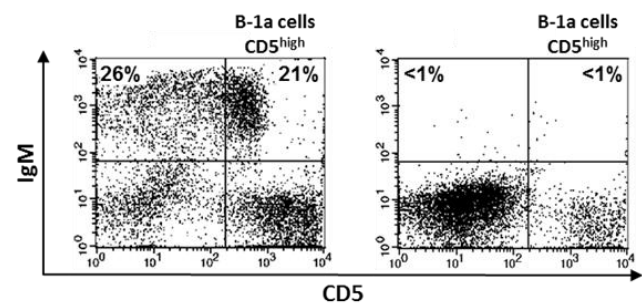

Peritoneum B-1a cells

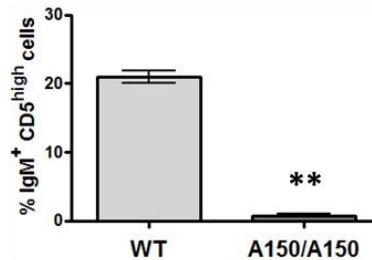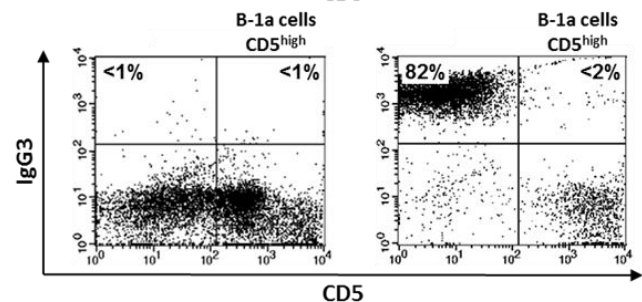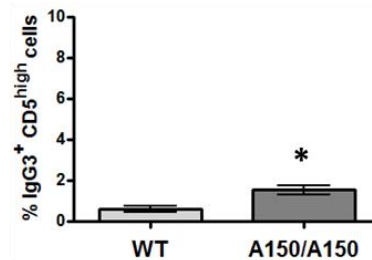

L

Fetal Liver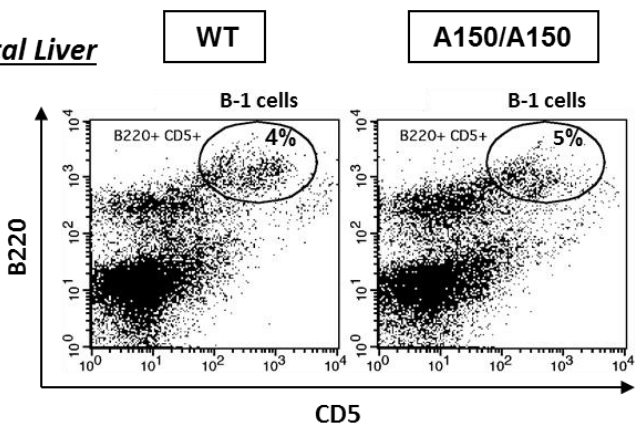

Fetal Liver B-1 cells

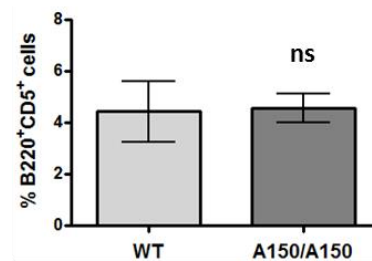

M

Spleen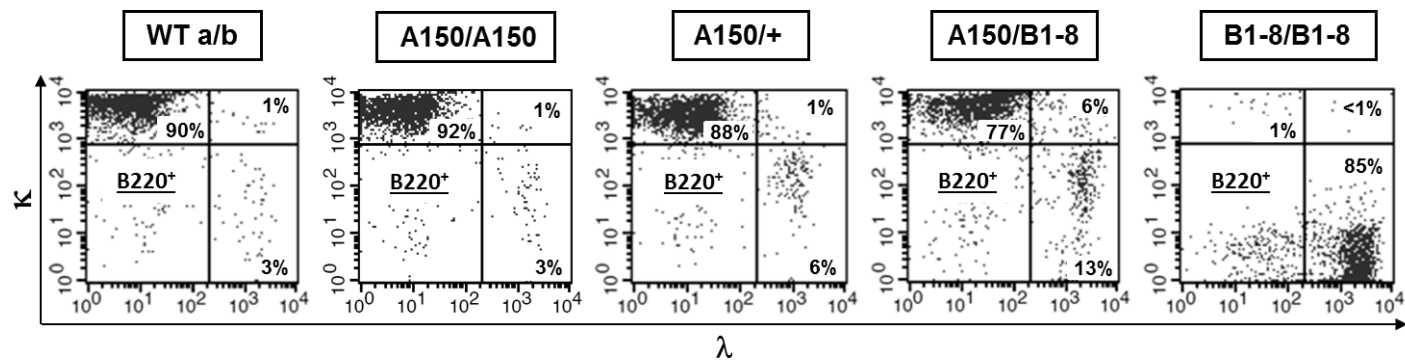

N

Spleen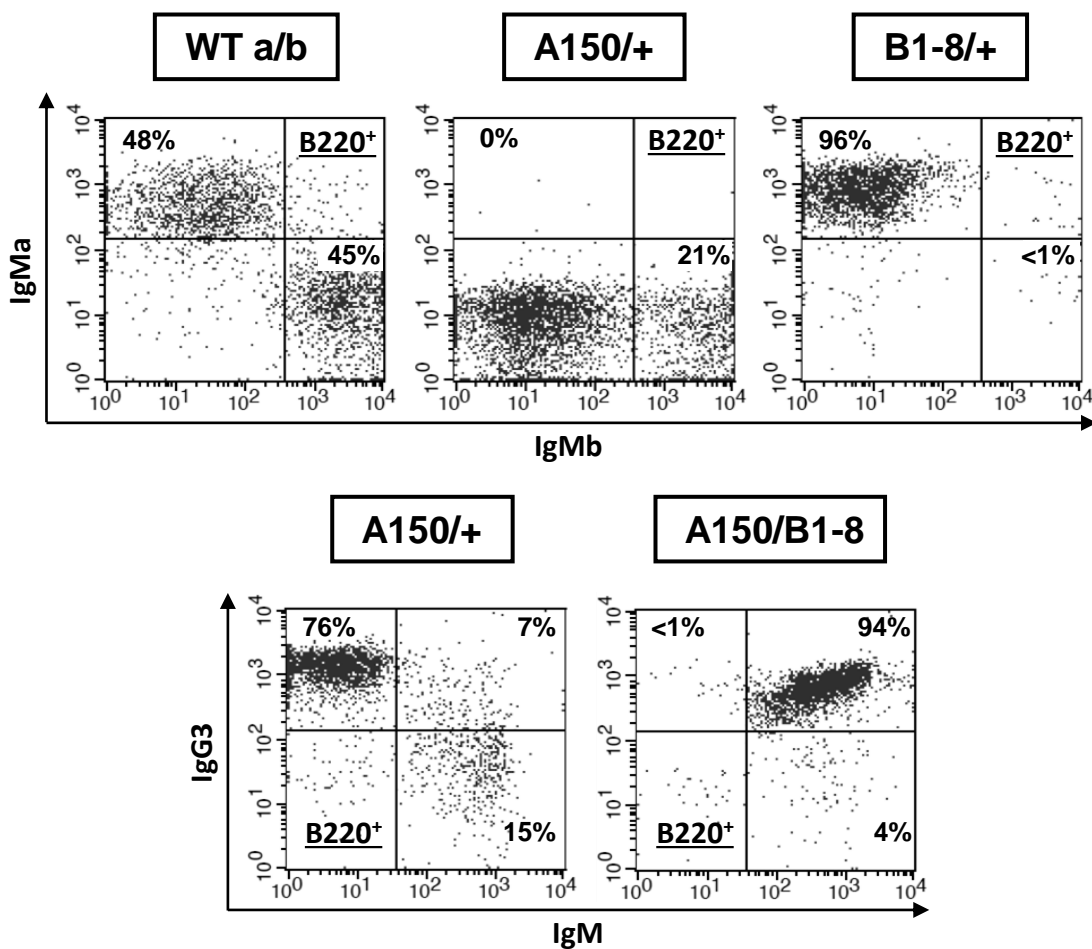

A

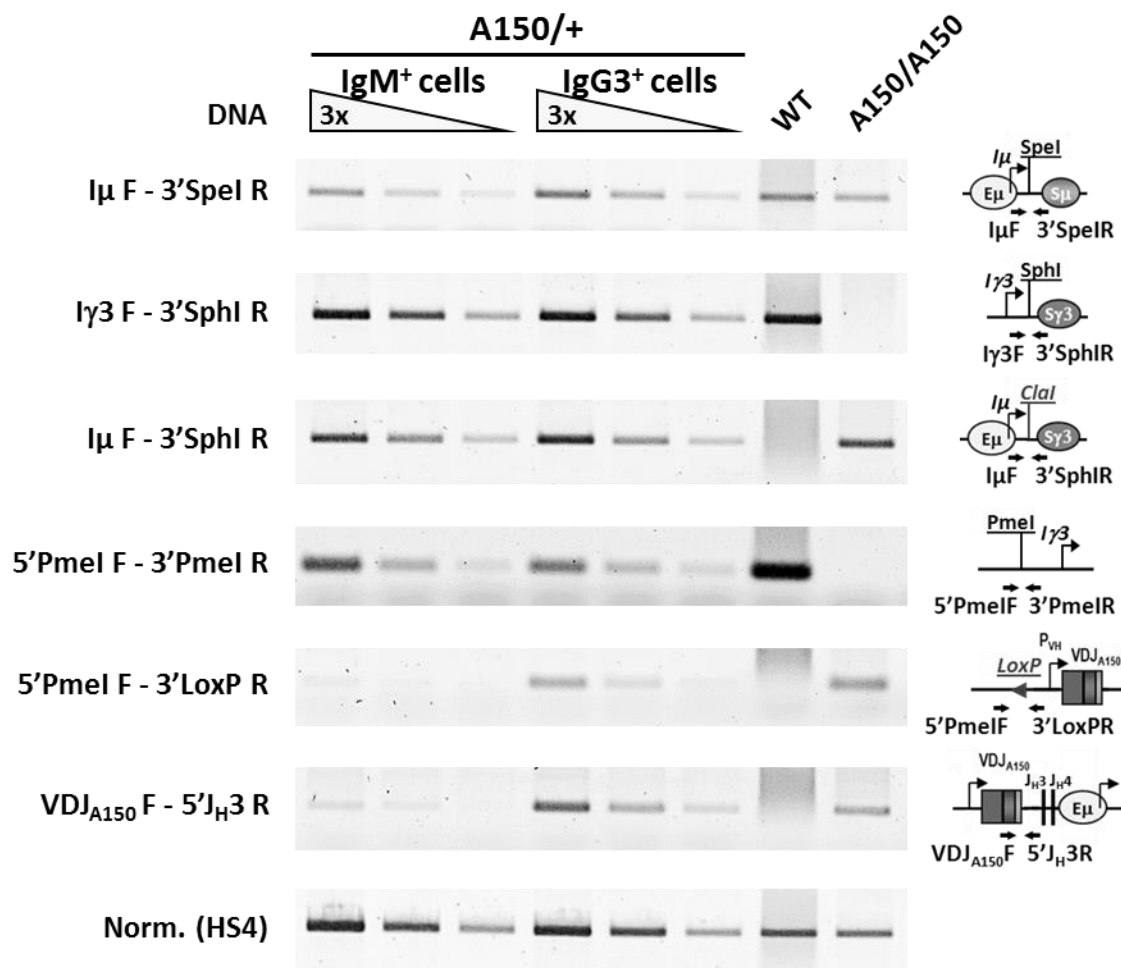

■ IgM<sup>+</sup> cells ■ IgG3<sup>+</sup> cells

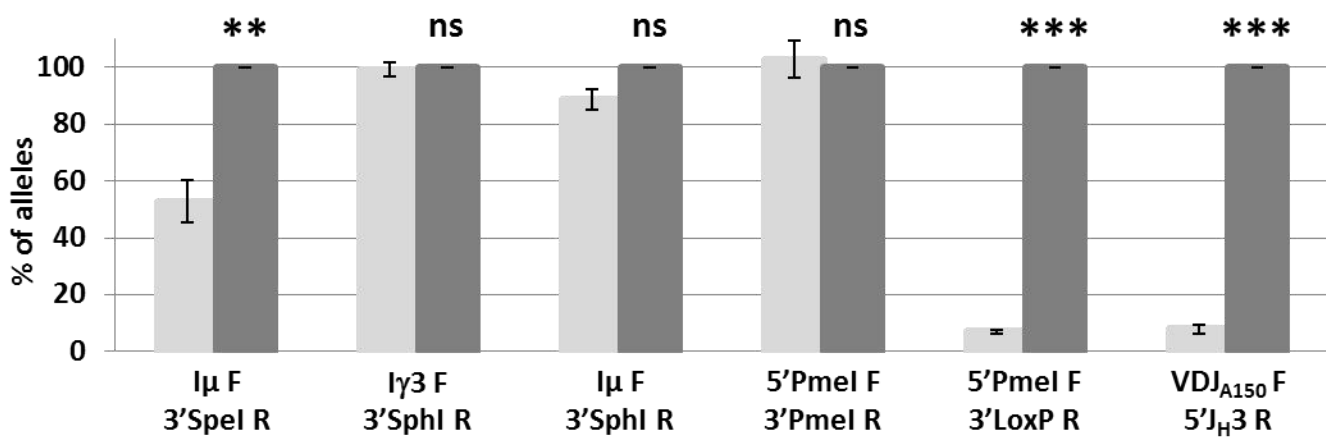

**B**

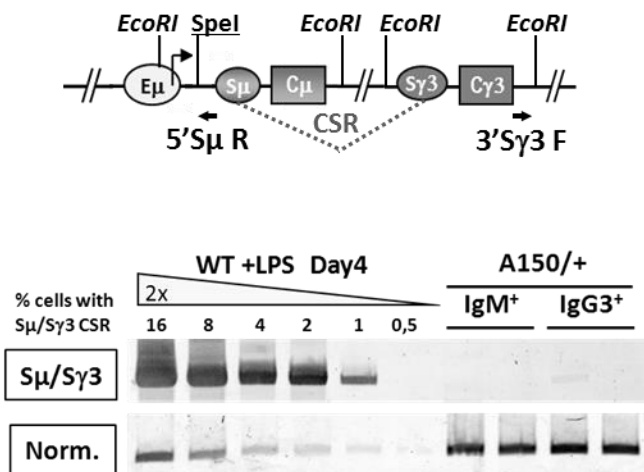

**C**

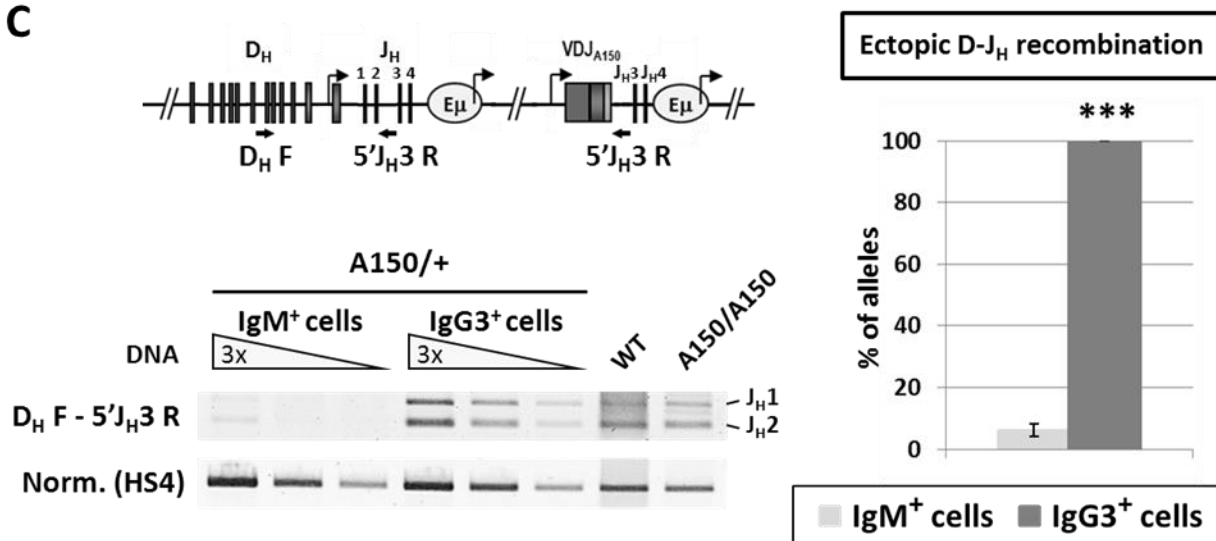



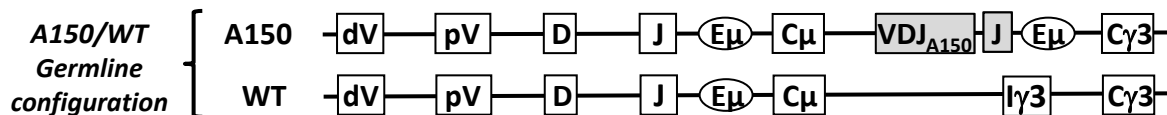

**A. IgMb<sup>+</sup> fraction**

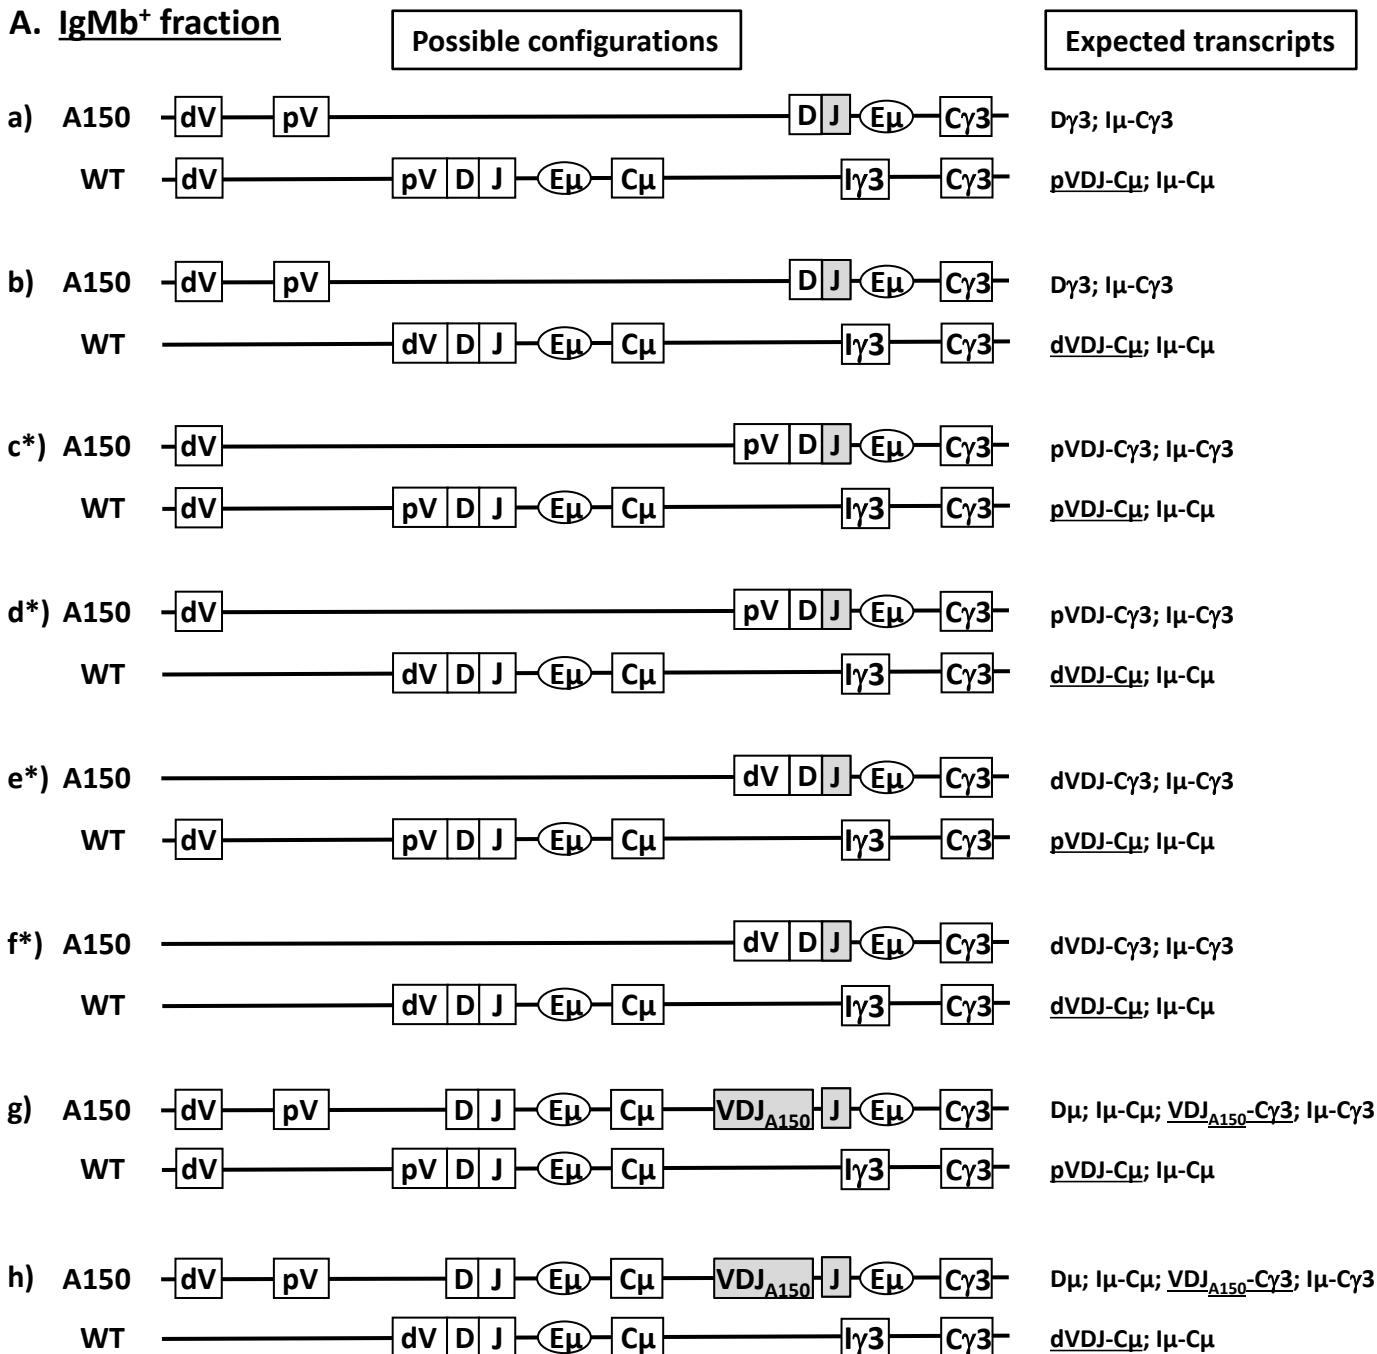

\* V-DJ rearrangements on the A150 allele occur first, but could be:

- 1) non-productive,
- 2) productive but  $\gamma$ 3 heavy chains do not pair with surrogate light chains/light chains
- 3) productive and  $\gamma$ 3 heavy chains pair with light chains, *en route* to double expression.



Sequences of the VDJ-C $\gamma$ 3 cDNAs from sorted A150/WT BM B cells.**A. Amplified joints (pV<sub>H</sub>7183-D-J<sub>H</sub>3) from sorted IgMb<sup>+</sup> cells**

| Seq n°                          | V <sub>H</sub> gene segment | N and P nucleotide additions                      | J <sub>H</sub> 3 segment           |
|---------------------------------|-----------------------------|---------------------------------------------------|------------------------------------|
| GL                              | ...tac tgt gca aga          |                                                   | cc tgg ttt gct tac tgg ggc caa ... |
| <i>In frame (4)</i>             |                             |                                                   |                                    |
| a02                             | ...tac tgt gca aga          | <i>cag ggg tcg g</i>                              | cc tgg ttt gct tac tgg ggc caa...  |
| a09                             | ...tac tgt gca aga          | <i>ccc ccc tcc tac tat agg tac gac gta c</i>      | gg ttt gct tac tgg ggc caa...      |
| c09                             | ...tac tgt gca aga          | <i>cct ccc tac tat gat tac gac gac gcg cct ct</i> | g ttt gct tac tgg ggc caa...       |
| c11                             | ...tac tgt gca aga          | <i>ccg cct act atg gta act c</i>                  | cc tgg ttt gct tac tgg ggc caa...  |
| <i>Out of frame (6)</i>         |                             |                                                   |                                    |
| a07                             | ...tac tgt gca aga          | <i>gac ata ggt acg ccg</i>                        | ggt tgc tta ctg ggg cca agg...     |
| b08                             | ...tac tgt                  | <i>acc agg ctc cca act ggg acc c</i>              | gt ttg ctt act ggg gcc aag...      |
| c05                             | ...tac tgt gtg aga          | <i>cat agc tgc tcg atg gtt act gac ggg</i>        | ggg ttg ctt act ggg gcc aag...     |
| c10                             | ...tac tgt gca aga          | <i>ggg ggg cc</i>                                 | t ttg ctt act ggg gcc aag...       |
| d03                             | ... tac tgt gtg aga         | <i>gat gat tat tac tac ggt agt agc tac tct</i>    | cct ggt ttg ctt act ggg gcc aag... |
| d09                             | ...tac tgt gca aga          | <i>ccc ccc ttt act ata ggt acg ccc</i>            | cct ggt ttg ctt act ggg gcc aag... |
| <i>Premature stop codon (3)</i> |                             |                                                   |                                    |
| a08                             | ...tac tgt gca aga          | <i>gat gca <u>tga</u></i>                         |                                    |
| b05                             | ...tac t                    | <i>tt gca aga caa cgg <u>tag</u></i>              |                                    |
| c07                             | ...tac                      | <i>ggg <u>tag</u></i>                             |                                    |

**J<sub>H</sub>3-C $\gamma$ 3**

cc tgg ttt gct tac tgg ggc caa ggg act ctg gtc act gtc tct gca **gct aca aca aca gcc cca tct gtc tat ccc ttg gtc cct ggc tgc agt gac aca tct gga tcc tcg gtg aca ctg gga tgc ctt gtc aaa ggc tac ttc cct gag ...**

**B. Amplified joints (pV<sub>H</sub>7183-D-J<sub>H</sub>4) from sorted IgMb<sup>+</sup> cells**

| Seq n°                          | V <sub>H</sub> gene segment | N and P nucleotide additions              | J <sub>H</sub> 4 segment              |
|---------------------------------|-----------------------------|-------------------------------------------|---------------------------------------|
| GL                              | ...tac tgt gca aga          |                                           | at tac tat gct atg gac tac tgg ggt... |
| <u>In frame (13)</u>            |                             |                                           |                                       |
| a03                             | ...tac tgt gca aga          | ccc ttt gat ggc ggt                       | tgg ggt...                            |
| a04                             | ...tac tgt                  | acc agg ccg aga aga tta cga cgg gg        | t tac tat gct atg gac tac tgg ggt...  |
| a10                             | ... tac                     | aag cct act ata ggt acg acc ttc           | tat gct atg gac tac tgg ggt...        |
| b06                             | ...tac tgt gca aga          | cca tac cct                               | tat gct atg gac tac tgg ggt...        |
| b07                             | ...tac tgt gca a            | aa gat ccc ccc atc tac tat gat tac gag cc | c tat gct atg gac tac tgg ggt...      |
| b10                             | ...tac tgt gca a            | ag tat tac tac ggc tac g                  | ac tat gct atg gac tac tgg ggt...     |
| c03                             | ...tac tgt gca aga          | agg cct act ata ggc ac                    | g gac tac tgg ggt...                  |
| c12                             | ...tac tgt gca aga          | cat aga acg atc cga tgg tta ccc gca t     | at tac tat gct atg gac tac tgg ggt... |
| d01                             | ...tac tgt g                | tg aag tat ggt aac tac ctt a              | ac tgg ggt...                         |
| d04                             | ...tac tgt g                | ta acg gta gtc agt tt                     | c tat gct atg gac tac tgg ggt...      |
| d07                             | ...tac tgt gca aga          | ggg tct acc ggg                           | gct atg gac tac tgg ggt...            |
| d10                             | ...tac tgt gca ag           | g cga tct act atg att acc tca t           | at tac tat gct atg gac tac tgg ggt... |
| d11                             | ...tac tgt gtg aga          | gtg ggg gt                                | t atg gac tac tgg ggt...              |
| <u>Out of frame (8)</u>         |                             |                                           |                                       |
| a05                             | ...tac tgt gca aga          | gac gcc cga ctg gga cg                    | t act atg cta tgg act act agg gtc...  |
| a06                             | ... tac tgt gca aga         | ggt aac tgc cca                           | tgc tat gga cta ctg ggg tca...        |
| b02                             | ...tac tgt gca aga          | gat aag gct atg att acg tac ggc ct        | t atg cta tgg act act ggg gtc...      |
| b03                             | ...tac tgt gca aga          |                                           | ...cag <b>cta</b> ...                 |
| c02                             | ...tac tgt gca aga          | cat cct act atg atg gtc cc                | a ctg ggg tca...                      |
| c06                             | ...tac tgt gca aga          | gac gcc cga ctg gga cg                    | t act atg cta tgg act act ggg gtc...  |
| c08                             | ...tac tgt                  | acc agg gtt atg att acg acg aga ggg gac   | cta tgc tat gga cta ctg ggg tca...    |
| d06                             | ... tac tgt gca aga         | cat ggg gat ggt aac cc                    | t atg cta tgg act act ggg gtc...      |
| <u>Premature stop codon (7)</u> |                             |                                           |                                       |
| a01                             | ...tac <u>tga</u>           | (ata ggt)                                 |                                       |
| b01                             | ... tac tg                  | g gcc cta <u>tga</u>                      |                                       |
| b11                             | ... tac tgt gca aga         | gat ata cgt cta cta <u>tag</u>            |                                       |
| b12                             | ... tac                     | ggg cta <u>tga</u>                        |                                       |
| c01                             | ... tac tgt gca ag          | c ccc cca <u>tag</u>                      |                                       |
| d02                             | ... tac tgt gca aga         | gat ata cgt cta cta <u>tag</u>            |                                       |
| d08                             | ...tac tgt gca aga          | cga agg ctt cta <u>tag</u>                |                                       |

**J<sub>H</sub>4-C<sub>γ</sub>3**

at cat tat gct atg gac tac tgg ggt caa gga acc tca gtc acc gtc tcc tca gct **aca aca aca gcc cca tct gtc tat ccc ttg gtc cct ggc tgc agt gac aca tct gga tcc tgc gtg aca ctg gga tgc ctt gtc aaa ggc tac ttc cct gag**

**C. Amplified joints (dV<sub>H</sub><sup>J558</sup>-D-J<sub>H</sub><sup>3</sup>) from sorted IgMb<sup>+</sup> cells**

| Seq n°                                                                                                                                                                                                         | V <sub>H</sub> gene segment | N and P nucleotide additions              | J <sub>H</sub> 3 segment             |
|----------------------------------------------------------------------------------------------------------------------------------------------------------------------------------------------------------------|-----------------------------|-------------------------------------------|--------------------------------------|
| GL                                                                                                                                                                                                             | ...tac tgt gca aga          |                                           | cc tgg ttt gct tac tgg ggc caa ...   |
| <u>In frame (4)</u>                                                                                                                                                                                            |                             |                                           |                                      |
| e08                                                                                                                                                                                                            | ...tac tgt gca aga          | <i>tcg gta ccg ggc ggg g</i>              | gg ggc caa...                        |
| f10                                                                                                                                                                                                            | ...tac tgt gca aga          | <i>gag aat ggt tac ccc c</i>              | tt gct tac tgg ggc caa...            |
| h01                                                                                                                                                                                                            | ...ttc tgt gca aga          | <i>gaa gaa gga tta cgg cc</i>             | g ttt gct tac tgg ggc caa...         |
| h05                                                                                                                                                                                                            | ...tat tgt gca aga          | <i>gag ggg ggt atc t</i>                  | cc tgg ttt gct tac tgg ggc caa...    |
| <u>Out of frame (6)</u>                                                                                                                                                                                        |                             |                                           |                                      |
| e02                                                                                                                                                                                                            | ...tac tgt aca aga          | <i>cgg ggt aac tac gtc</i>                | ggt tgc tta ctg ggg cca agg...       |
| f12                                                                                                                                                                                                            | ...tac tgt aca aga          | <i>cgg gga tta cgg gg</i>                 | c ctg gtt tgc tta ctg ggg cca agg... |
| g03                                                                                                                                                                                                            | ...tac tgt gca aga          | <i>ggg ggt act acg gta ccc t</i>          | gg gcc aag...                        |
| f03                                                                                                                                                                                                            | ...tac tgt gca              | <i>cgc tcc tcc gtc tat gat tac gg</i>     | g ctt act ggg gcc aag...             |
| g10                                                                                                                                                                                                            | ...tac tgt gca aga          | <i>gaa ggg act atg gag gct g</i>          | tg ggg cca agg...                    |
| e06                                                                                                                                                                                                            | ...tac tgt gca aga          | <i>gaa ggg gat ggt aac ag</i>             | c ctg gtt tgc tta ctg ggg cca agg... |
| <u>Premature stop codon (7)</u>                                                                                                                                                                                |                             |                                           |                                      |
| e11                                                                                                                                                                                                            | ...tac tgt gca aga          | <i>tgg gga cta <u>tag</u></i>             |                                      |
| g05                                                                                                                                                                                                            | ...tac tgt gca ag           | <i>t gga cta <u>tag</u></i>               |                                      |
| e04                                                                                                                                                                                                            | ...ttc tgt gca aga          | <i>ggg ggc cta <u>tga</u></i>             |                                      |
| f09                                                                                                                                                                                                            | ...tat tgt gca aga          | <i><u>tag</u></i>                         |                                      |
| g04                                                                                                                                                                                                            | ...ttc tgt gca aga          | <i>tgg <u>taa</u></i>                     |                                      |
| g07                                                                                                                                                                                                            | ...tac tgt gca a            | <i>ct <u>tga</u></i>                      |                                      |
| h11                                                                                                                                                                                                            | ... tac tgt gca aga         | <i>ggg tac tac ggt agt agc <u>taa</u></i> |                                      |
| <u>Pseudogenes (1)</u>                                                                                                                                                                                         |                             |                                           |                                      |
| f07                                                                                                                                                                                                            |                             |                                           |                                      |
| <b>J<sub>H</sub>3-C<math>\gamma</math>3</b>                                                                                                                                                                    |                             |                                           |                                      |
| cc tgg ttt gct tac tgg ggc caa ggg act ctg gtc act gtc tct gca gct aca aca aca gcc cca tct gtc tat ccc ttg gtc cct ggc tgc agt gac aca tct gga tcc tcg gtc aca ctg gga tgc ctt gtc aaa ggc tac ttc cct gag ... |                             |                                           |                                      |

**D. Amplified joints (dV<sub>H</sub>J558-D-J<sub>H</sub>4) from sorted IgMb<sup>+</sup> cells**

| Seq n° V <sub>H</sub> gene segment                                                                                                                                                                                        | N and P nucleotide additions                       | J <sub>H</sub> 4 segment              |
|---------------------------------------------------------------------------------------------------------------------------------------------------------------------------------------------------------------------------|----------------------------------------------------|---------------------------------------|
| GL ...tac tgt gca aga                                                                                                                                                                                                     |                                                    | at tac tat gct atg gac tac tgg ggt... |
| <u>In frame (5)</u>                                                                                                                                                                                                       |                                                    |                                       |
| e10 ...tac tgt gca ag                                                                                                                                                                                                     | <i>g ggg gga tgg tta tt</i>                        | t gct atg gac tac tgg ggt...          |
| f04 ...tac tgg gca                                                                                                                                                                                                        | <i>tta cta cgg cta cgt gag aga gat tat agg ctt</i> | gac tac tgg ggc...                    |
| g08 ...tac tgt gca aga                                                                                                                                                                                                    | <i>tgt ggg ggt aac tac cca caa gtg gga cta</i>     | tac tat gct atg gac tac tgg ggt...    |
| h03 ...tac tgt gca                                                                                                                                                                                                        | <i>tgg cgg act ata ggt acg acg gga gac cct</i>     | tat gct atg gac tac tgg ggt...        |
| h08 ... gac act gca                                                                                                                                                                                                       | <i>gtc tcc ttc ata ggt at</i>                      | c tat gct atg gac tac tgg ggt...      |
| <u>Out of frame (8)</u>                                                                                                                                                                                                   |                                                    |                                       |
| e03 ...tac tgt gca aga                                                                                                                                                                                                    | <i>tgg gcc tac tat ggt aac tac gag ggt tt</i>      | a tta cta tgc tat gga cta ctg ggg...  |
| e05 ...tct gcg gcc agg                                                                                                                                                                                                    | <i>cct act ata aac ccg</i>                         | act ggg gtc...                        |
| f01 ...tac tgt gca aga                                                                                                                                                                                                    | <i>gga agg ggc att ccc t</i>                       | ct atg cta tgg act act ggg gtc...     |
| f08 ...tac tgt gca a                                                                                                                                                                                                      | <i>ct ggg aaa cgg g</i>                            | ct atg cta tgg act act ggg gtc...     |
| g06 ...tac tgt gca aga                                                                                                                                                                                                    | <i>tct aac tgg gag ggc att t</i>                   | ta tgc tat gga cta ctg ggg tca...     |
| g11 ...tac tgt gca aga                                                                                                                                                                                                    | <i>ggt ggt tac tac tct atg</i>                     | cta tgg act act ggg gtc...            |
| g12 ...tac tgt gca aga                                                                                                                                                                                                    | <i>gag gag gca ccg ggg</i>                         | cta tgc tat gga cta ctg ggg tca...    |
| h02 ...tac                                                                                                                                                                                                                | <i>tac ggt acc cc</i>                              | t act atg cta tgg act act ggg gtc...  |
| <u>Premature stop codon (5)</u>                                                                                                                                                                                           |                                                    |                                       |
| e01 ...tac tgt gca                                                                                                                                                                                                        | <i>ggt ata cta <u>tag</u></i>                      |                                       |
| e09 ...tac tgt gca aga                                                                                                                                                                                                    | <i>agg <u>tag</u></i>                              |                                       |
| f06 ...tac tgt gca                                                                                                                                                                                                        | <i>gaa gat tta cta cgg <u>tag</u></i>              |                                       |
| f11 ...ttc tgt gca aga                                                                                                                                                                                                    | <i>caa <u>tga</u></i>                              |                                       |
| h07 ... tac tgt                                                                                                                                                                                                           | <i>act cga tgg <u>taa</u></i>                      |                                       |
| <u>Pseudogenes (2)</u>                                                                                                                                                                                                    |                                                    |                                       |
| h04                                                                                                                                                                                                                       |                                                    |                                       |
| h05                                                                                                                                                                                                                       |                                                    |                                       |
| <b>J<sub>H</sub>4-C<math>\gamma</math>3</b>                                                                                                                                                                               |                                                    |                                       |
| at cat tat gct atg gac tac tgg ggt caa gga acc tca gtc acc gtc tcc tca gct <b>aca aca aca gcc cca tct gtc tat ccc tfg gtc cct ggc tgc agt gac aca tct gga tcc tgc gtc aca ctg gga tgc ctt gtc aaa ggc tac ttc cct gag</b> |                                                    |                                       |

**E. Amplified joints (pV<sub>H</sub>7183-D-J<sub>H</sub>3) from sorted IgG3<sup>+</sup> cells**

| Seq n° V <sub>H</sub> gene segment | N and P nucleotide additions             | J <sub>H</sub> 3 segment           |
|------------------------------------|------------------------------------------|------------------------------------|
| GL ...tac tgt gca aga              |                                          | cc tgg ttt gct tac tgg ggc caa ... |
| <i>In frame (11)</i>               |                                          |                                    |
| a04 ...tac tgt                     | <i>acg gat gta aga ggg aag g</i>         | tt gct tac tgg ggc caa...          |
| b12 ... tac tgt gca aga            | <i>gag gat gat tac gcc ca</i>            | g ttt gct tac tgg ggc caa...       |
| c04 ... tac tgt gca aga            | <i>ggg ggc cat gat ggt tac tac tcc</i>   | ttt gct tac tgg ggc caa...         |
| c05 ... tac tgt gca aga            | <i>cat gtg atg gtt act acg g</i>         | cc tgg ttt gct tac tgg ggc caa...  |
| c06 ... tac tgt gca aga            | <i>cat gga cct cc</i>                    | g ttt gct tac tgg ggc caa...       |
| c10 ...tac tgt gca aga             | <i>cat agc g</i>                         | gg ttt gct tac tgg ggc caa...      |
| d04 ... tac tgt gtg aga            | <i>caa agc agt t</i>                     | cc tgg ttt gct tac tgg ggc caa...  |
| d05 ... tac tgt gca aga            | <i>cat gag ggg ggt tac t</i>             | cc tgg ttt gct tac tgg ggc caa...  |
| d07 ... tac tgt gca aga            | <i>gga gga caa ctg gga agg tcg g</i>     | cc tgg ttt gct tac tgg ggc caa...  |
| d08 ... tac tgt gtg aga            | <i>gag ggt ggt aac tac ggg aaa gga g</i> | cc tgg ttt gct tac tgg ggc caa...  |
| d09 ... tac tgt gca aga            | <i>cat aac tac ggt agt agc tac</i>       | ttt gct tac tgg ggc caa...         |
| <i>Premature stop codon (1)</i>    |                                          |                                    |
| c07 ... tac tgt gca ag             | <i>g tat <u>tga</u></i>                  |                                    |

**J<sub>H</sub>3-C $\gamma$ 3**

cc tgg ttt gct tac tgg ggc caa ggg act ctg gtc act gtc tct gca **gct aca aca aca gcc cca tct gtc tat ccc ttg gtc cct ggc tgc agt gac aca tct gga tcc tcg gtg aca ctg gga tgc ctt gtc aaa ggc tac ttc cct gag ...**

## F. Amplified joints (pV<sub>H</sub>7183-D-J<sub>H</sub>4) from sorted IgG3<sup>+</sup> cells

| Seq n°                          | V <sub>H</sub> gene segment | N and P nucleotide additions                     | J <sub>H</sub> 4 segment              |
|---------------------------------|-----------------------------|--------------------------------------------------|---------------------------------------|
| GL                              | ...tac tgt gca aga          |                                                  | at tac tat gct atg gac tac tgg ggt... |
| <u>In frame (29)</u>            |                             |                                                  |                                       |
| a01                             | ...tac tgt gca a            | <i>cc ctc ccc tca tta cta cgg ccc tta t</i>      | at tac tat gct atg gac tac tgg ggt... |
| a02                             | ...tac tgt gca aga          | <i>agc gga cgt g</i>                             | at gct atg gac tac tgg ggt...         |
| a03                             | ...tat tgt agt aga          | <i>tcc tgg gcg agg g</i>                         | at gct atg gac tac tgg ggt...         |
| a06                             | ...tac tgt gca aga          | <i>tca agg acc ccc c</i>                         | ac tat gct atg gac tac tgg ggt...     |
| a07                             | ...tac tgt gca aga          | <i>cat ggg ggg gta cca tgg</i>                   | gct atg gac tac tgg ggt...            |
| a09                             | ...tac tgt gca aga          | <i>ggg ggg tac gac g</i>                         | at gct atg gac tac tgg ggt...         |
| a10                             | ...tac tgt gca aga          | <i>cat cag gct atg att acc tca t</i>             | at tac tat gct atg gac tac tgg ggt... |
| a11                             | ...tac tgt gca aga          | <i>cat gac tcc tgg gcc</i>                       | tac tat gct atg gac tac tgg ggt...    |
| b01                             | ...tac tgt gca aga          | <i>gat aag gaa a</i>                             | at tac tat gct atg gac tac tgg ggt... |
| b02                             | ...tac tgt gca aga          | <i>gaa ggg gtt acg aca ggg g</i>                 | at tac tat gct atg gac tac tgg ggt... |
| b03                             | ...tac tgt gca aga          | <i>tcc tcc ccc tac cga ggg tac ttc gat gtc</i>   | tgg ggc...                            |
| b04                             | ...tac tgt gca aga          | <i>cat gcg gac tac ggt agt agc ccc tgg</i>       | gct atg gac tac tgg ggt...            |
| b05                             | ... tac tgt gca aga         | <i>caa ggg ggg gat ctc tat gat ggt tac tac a</i> | at gct atg gac tac tgg ggt...         |
| b06                             | ... tac tgt gca aga         | <i>caa gag gga ccc tc</i>                        | t tac tat gct atg gac tac tgg ggt...  |
| b07                             | ... tac tgt gca aga         | <i>gaa tcg g</i>                                 | ac tat gct atg gac tac tgg ggt...     |
| b08                             | ... tac tgt gca aga         | <i>ggc cgg ggg t</i>                             | tg gac tac tgg ggt...                 |
| b09                             | ...tac tgt gca aga          | <i>gtt tat tac tac ggt agt gag</i>               | gct atg gac tac tgg ggt...            |
| b10                             | ... tac tgt gca ag          | <i>g ggg gtc tac tat ggt tac gac gaa gag a</i>   | at gct atg gac tac tgg ggt...         |
| b11                             | ... tac tgt gca aga         | <i>gaa ggg gtt acg aca ggg g</i>                 | at tac tat gct atg gac tac tgg ggt... |
| c02                             | ... tac tgt gca aga         | <i>ggg gca aac tgg gac tac ttt</i>               | gac tac tgg ggc...                    |
| c03                             | ... tac tgt gca ag          | <i>c ctt tgg ccc t</i>                           | ct atg gac tac tgg ggt...             |
| c08                             | ... tac tgt gca aga         | <i>cat gaa ggg ggt aag gag ggg aaa atg</i>       | gct atg gac tac tgg ggt...            |
| c09                             | ... tac tgt gca aga         | <i>ggg aaa ctg gga gag ct</i>                    | t gct atg gac tac tgg ggt...          |
| c12                             | ... tac tgt gca aga         | <i>acc ctc tac ctc</i>                           | tac tat gct atg gac tac tgg ggt...    |
| d01                             | ... tac tgt gca aga         | <i>gaa aac tat agg</i>                           | tat gct atg gac tac tgg ggt...        |
| d02                             | ... tac tgt gca ag          | <i>c tct atg att acg ac</i>                      | t tac tat gct atg gac tac tgg ggt...  |
| d03                             | ... tac tgt gca aga         | <i>cag agc tg</i>                                | c tat gct atg gac tac tgg ggt...      |
| d06                             | ... tac tgt gca aga         | <i>gat cga ggt aat gg</i>                        | t gct atg gac tac tgg ggt...          |
| d12                             | ... tac tgt aca aga         | <i>gga ctg gcg</i>                               | tac tat gct atg gac tac tgg ggt...    |
| <u>Premature stop codon (1)</u> |                             |                                                  |                                       |
| c11                             | ... tac tat gct a           | <i>tg gac tac tag</i>                            |                                       |

### J<sub>H</sub>4-C<sub>γ</sub>3

at cat tat gct atg gac tac tgg ggt caa gga acc tca gtc acc gtc tcc tca gct aca aca aca gcc cca tet gtc tat ccc tfg gtc cct ggc tgc agt gac aca tct gga tcc tgc gtc aca ctg gga tgc ctt gtc aaa ggc tac ttc cct gag



**G. Amplified joints (dV<sub>H</sub>J558-D-J<sub>H</sub>3) from sorted IgG3<sup>+</sup> cells**

| Seq n°              | V <sub>H</sub> gene segment | N and P nucleotide additions               | J <sub>H</sub> 3 segment           |
|---------------------|-----------------------------|--------------------------------------------|------------------------------------|
| GL                  | ...tac tgt gca aga          |                                            | cc tgg ttt gct tac tgg ggc caa ... |
| <i>In frame (5)</i> |                             |                                            |                                    |
| e11                 | ...tac tgt gca aga          | <i>gac ctt</i>                             | ttt gct tac tgg ggc caa ...        |
| f06                 | ...tac tgt aca aga          | <i>gat acg atg atg gtt act g</i>           | cc tgg ttt gct tac tgg ggc caa...  |
| f10                 | ... ttc tgt gct aga         | <i>gtg agg gac tac tat gat tac gac ggc</i> | ttt gtt tac tgg ggc caa...         |
| f11                 | ... tac tgt gc              | <i>g cta ggg ggg acc cct ctt</i>           | ttt gct tac tgg ggc caa...         |
| h09                 | ... tac tgt aca aga         | <i>tcg gct atg gta act acg ttg g</i>       | cc tgg ttt gct tac tgg ggc caa...  |

**J<sub>H</sub>3-C<sub>γ</sub>3**

cc tgg ttt gct tac tgg ggc caa ggg act ctg gtc act gtc tct gca **gct aca aca aca gcc cca tct gtc tat ccc ttg gtc cct ggc tgc agt gac aca tct gga tcc tcg gtg aca ctg gga tgc ctt gtc aaa ggc tac ttc cct gag ...**

**H. Amplified joints (dV<sub>H</sub>J558-D-J<sub>H</sub>4) from sorted IgG3<sup>+</sup> cells**

| Seq n°               | V <sub>H</sub> gene segment | N and P nucleotide additions                       | J <sub>H</sub> 4 segment              |
|----------------------|-----------------------------|----------------------------------------------------|---------------------------------------|
| GL                   | ...tac tgt gca aga          |                                                    | at tac tat gct atg gac tac tgg ggt... |
| <i>In frame (37)</i> |                             |                                                    |                                       |
| e01                  | ...tac tgt gca aga          | <i>gcc tgg gac g</i>                               | ac tat gct atg gac tac tgg ggt...     |
| e02                  | ...tat tgt gca aga          | <i>agg aat agt aac tac ttt</i>                     | tat gct atg gac tac tgg ggt...        |
| e03                  | ...ttc tgt gca aga          | <i>acg gt</i>                                      | t tac tat gct atg gac tac tgg ggt...  |
| e05                  | ...tac tgt gca aga          | <i>agc tat ggt a</i>                               | ac tat gct atg gac tac tgg ggt...     |
| e06                  | ...tac tgt gga aga          | <i>agg gac tgg gac gt</i>                          | t gct atg gac tac tgg ggt...          |
| e07                  | ...ttc tgt gca aga          | <i>tcc ggc gct agg act g</i>                       | at gct atg gac tac tgg ggt...         |
| e08                  | ...tac tgt aca aga          | <i>gac tat agg tac gac gaa t</i>                   | ac tat gct atg gac tac tgg ggt...     |
| e09                  | ...tac tgt gca ag           | <i>g gag atg gta act gag gtt t</i>                 | ac tat gct atg gac tac tgg ggt...     |
| e10                  | ...ttc tgt gca aga          | <i>gga cgg ccg</i>                                 | tat gct atg gac tac tgg ggt...        |
| e12                  | ...tac tgt aca aga          | <i>tgg gga ctg gga ggg gat t</i>                   | ac tat gct atg gac tac tgg ggt...     |
| f01                  | ...tac tgt gca aga          | <i>ggg agg act acg</i>                             | gct atg gac tac tgg ggt...            |
| f03                  | ...ttc tgt gc               | <i>c tgt tac tac gac tat c</i>                     | ct atg gac tac tgg ggt...             |
| f04                  | ...tac tgt gca ag           | <i>g ccg atc tat gat ggt tac ccc tt</i>            | t gct atg gac tac tgg ggt...          |
| f05                  | ...tac tgt aca aga          | <i>gcg gaa ctg ggc ct</i>                          | c tat gct atg gac tac tgg ggt...      |
| f08                  | ...tac tgt gca aga          | <i>cat ggt aac t</i>                               | ac tat gct atg gac tac tgg ggt...     |
| f09                  | ...tac tgt gca aga          | <i>gcc cct tac tac ggt cat t</i>                   | ac tat gct atg gac tac tgg ggt...     |
| g01                  | ...tac tgt gca ag           | <i>g ggg gtg gga cga cgg gat t</i>                 | ac tat gct atg gac tac tgg ggt...     |
| g02                  | ...tac tgt gca aga          | <i>agg aca ggt ct</i>                              | c tat gct atg gac tac tgg ggt...      |
| g03                  | ...tat tgt gca aga          | <i>tca ggg tat ggt aac tac gta a</i>               | at gct atg gac tac tgg ggt...         |
| g04                  | ...ttc tgt gca aga          | <i>ggg gga cag gg</i>                              | c tat gct atg gac tac tgg ggt...      |
| g05                  | ...tac tgt aca aga          | <i>tcc ctc ggg gcg g</i>                           | ac tat gct atg gac tac tgg ggt...     |
| g06                  | ...tac tgt gca aga          | <i>atg gga gta tgg g</i>                           | ac tat gct atg gac tac tgg ggt...     |
| g07                  | ...tac tgt aca aga          | <i>ggt aac tgg gac gag</i>                         | gct atg gac tac tgg ggt...            |
| g08                  | ...tac tgt gca aga          | <i>acc tcc ct</i>                                  | c tat gct atg gac tac tgg ggt...      |
| g09                  | ...tac tgt gca a            | <i>ta ggt acg acg agg g</i>                        | ac tat gct atg gac tac tgg ggt...     |
| g10                  | ...tac tgt gca aga          | <i>ggg act atg gta act cct</i>                     | tat gct atg gac tac tgg ggt...        |
| g11                  | ...tac tgt gca a            | <i>ta ggt acg</i>                                  | gct atg gac tac tgg ggt...            |
| g12                  | ...tac tgt gca aga          | <i>caa ctg ggt t</i>                               | ac tat gct atg gac tac tgg ggt...     |
| h02                  | ...tac tgt gca aga          | <i>ggc ggt tta cta cgg cta c</i>                   | ac tat gct atg gac tac tgg ggt...     |
| h03                  | ...tac tgt gca aga          | <i>tcg gag ggt ata ggt acg acg tgg ggt ggg acg</i> | gct atg gac tac tgg ggt...            |
| h05                  | ...tac tgt gca aga          | <i>gct ggg acc cct</i>                             | tat gct atg gac tac tgg ggt...        |
| h06                  | ...tac tgt aca ag           | <i>t tct atg gta act acg tt</i>                    | t gct atg gac tac tgg ggt...          |
| h07                  | ...tac tgt gca aga          | <i>gga gct atg atg gtt acc ccc ttg ggg</i>         | gct atg gac tac tgg ggt...            |
| h08                  | ...tac tgt gca aga          | <i>gga gaa ggt t</i>                               | ac tat gct atg gac tac tgg ggt...     |
| h10                  | ...tac tgt gca aga          | <i>atc ccg ccg ggt t</i>                           | ac tat gct atg gac tac tgg ggt...     |
| h11                  | ...tac tgt gca aga          | <i>ggg cct agt atg gta acc cct t</i>               | ac tat gct atg gac tac tgg ggt...     |
| h12                  | ...ttc tgt gca aga          | <i>tct ccc tat gat t</i>                           | ac tat gct atg gac tac tgg ggt...     |

*Pseudogene (1)*

f07

**J<sub>H</sub>4-C<sub>γ</sub>3**

at cat tat gct atg gac tac tgg ggt caa gga acc tca gtc acc gtc tcc tca gct aca aca aca gcc cca tct gtc tat ccc ttg gtc cct  
 ggc tgc agt gac aca tct gga tcc tcc gtc gtc aca ctg gga tgc ctt gtc aaa ggc tac ttc cct gag

Sequences of the V<sub>H</sub>-D-J<sub>H</sub>4 junctions from WT and A150 Pro-B cells.**A. Amplified joints (V<sub>H</sub><sup>7183</sup>-D-J<sub>H</sub>4) from WT Pro-B cells**

| Seq n°                                 | V <sub>H</sub> gene segment | N and P nucleotide additions                          | J <sub>H</sub> 4 segment               |
|----------------------------------------|-----------------------------|-------------------------------------------------------|----------------------------------------|
| GL                                     | ...tac tgt gca aga          |                                                       | at tac tat gct atg gac tac tgg ggt...  |
| <u><i>In frame (21)</i></u>            |                             |                                                       |                                        |
| 01                                     | ...tac tgt gca aga          | cat gaa gag                                           | atg gac tac tgg ggt...                 |
| 02                                     | ...tac tgt                  | acc agg agg gcc ccc gcc tac tat agg tac gac gg        | c tat gct atg gac tac tgg ggt...       |
| 03                                     | ...tac tgt gca aga          | cat agg tct acg gag                                   | gct atg gac tac tgg ggt...             |
| 04                                     | ...tac tgt gca aga          | cat caa agg ccc ttc att act acg gct acg gga cca ttt a | ac tat gct atg gac tac tgg ggt...      |
| 05                                     | ...tac tgt gca aga          | cat cag gat tac ctc gcc aa                            | t tac tat gct atg gac tac tgg ggt...   |
| 07                                     | ...tac tgt gca aga          | gat ccc tcc ttc tac tat gat tac gac ggg               | tac tat gct atg gac tac tgg ggt...     |
| 10                                     | ...tac tgt gca aga          | cat cga att act acc c                                 | ct atg gac tac tgg ggt...              |
| 17                                     | ...tac tgt                  | acc agg cca agg ggg gac tac ggc tgg g                 | ac tat gct atg gac tac tgg ggt...      |
| 18                                     | ...tac tgt gca aga          | ccg ggg gcg ag                                        | c tac tgg ggt...                       |
| 19                                     | ...tac tgt                  | acc agg tgt ggt tac ctc tca t                         | at tac tat gct atg gac tac tgg ggt...  |
| 21                                     | ...tac tgt gca aga          | cat agc ccc cac tac tat ggt aac tac gg                | t gct atg gac tac tgg ggt...           |
| 22                                     | ...tac tgt gca aga          | gag gac tat gaa acg t                                 | ct atg gac tac tgg ggt...              |
| 23                                     | ...tac tgt gca aga          | gat gca tgg ggt tac tac g                             | at gct atg gac tac tgg ggt...          |
| 24                                     | ...tac tgt gca aga          | gat agg gga tta cta cgg cta cgt gag g                 | tg gac tac tgg ggt...                  |
| 29                                     | ...tac tgt gca aga          | ccc ttt att act acg gta gta gcg                       | tac tat gct atg gac tac tgg ggt...     |
| 35                                     | ...tac tgt                  | aca att tat ggt aac tac cgt                           | tat gct atg gac tac tgg ggt...         |
| 37                                     | ...tac tgt gca aga          | cgc ggt g                                             | ac tat gct atg gac tac tgg ggt...      |
| 39                                     | ...tac tgt gca aga          | cat ggg aac tat agg tac gac aga gg                    | c tat gct atg gac tac tgg ggt...       |
| 40                                     | ...cac tgt gca aga          | gga att act acg gta gta gag g                         | at gct atg gac tac tgg ggt...          |
| 42                                     | ...tac tgt gca aga          | gat cgc tat ggt aaa aag ggg gtc cta t                 | ct atg gac tac tgg ggt...              |
| 43                                     | ...tac tgt gca aga          | cat gaa gag                                           | atg gac tac tgg ggt...                 |
| <u><i>Out of frame (12)</i></u>        |                             |                                                       |                                        |
| 08                                     | ...tac tgt gca aga          | aaa ggg ggt aac tac tct                               | att act atg cta tgg act act ggg gtc... |
| 14                                     | ...tac tgt gca aga          | cta tgg tta cga ccg g                                 | ta tgc tat gga cta ctg ggg tca...      |
| 15                                     | ...tac tgt gca aga          | gaa cac cct ctc cct cta cta tgg tta cga cga gg        | a cta tgc tat gga cta ctg ggg tca...   |
| 27                                     | ...tac tgt gca aga          | cat agt ggt acg acg ccg ggg                           | act atg cta tgg act act agg gtc...     |
| 30                                     | ...tac tgt gca a            | aa cct cga tgg                                        | tta cta tgc tat gga cta ctg ggg tca... |
| 31                                     | ...tac tgt gca aga          | cag gta acc ctc                                       | cta tgc tat gga cta ctg ggg tca...     |
| 32                                     | ...tac tgt g                | ta acc cgg gg                                         | g cta tgg act act ggg gtc...           |
| 33                                     | ...tac tgt gca aga          | cgg atc tat agg tac gac gct                           | tat gga cta ctg ggg tca...             |
| 36                                     | ...tac tgt gca a            | aa acc tgg atg g                                      | tt act atg cta tgg act act ggg gtc...  |
| 41                                     | ... tac tgt gca aga         | cat gcc tac tat ggt aac ggt                           | tgg act act ggg gtc...                 |
| 45                                     | ...tac tgt gca aga          | gaa ggc aga cag ctc ggg ccc                           | tta cta tgc tat gga cta ctg ggg tca... |
| 46                                     | ...tac tgt gca aga          | gcc cgt tat ggt aac tac gat                           | att act atg cta tgg act act ggg gtc... |
| <u><i>Premature stop codon (5)</i></u> |                             |                                                       |                                        |
| 09                                     | ...tac tgt gca ag           | g cta cta tag                                         |                                        |
| 12                                     | ...tac tgt gca aga          | aga cta tgg taa                                       |                                        |
| 13                                     | ... tac tgt gca aga         | cat tag                                               |                                        |
| 26                                     | ... tac tgt gca aga         | cga gga cta tag                                       |                                        |
| 44                                     | ...tac tgt gca aga          | gat gtc cta cta tag                                   |                                        |

**B. Amplified joints (V<sub>H</sub><sup>7183-D-J<sub>H</sub>4</sup>) from A150 Pro-B cells**

| Seq n°                      | V <sub>H</sub> gene segment | N and P nucleotide additions                 | J <sub>H</sub> 4 segment              |
|-----------------------------|-----------------------------|----------------------------------------------|---------------------------------------|
| GL                          | ...tac tgt gca aga          |                                              | at tac tat gct atg gac tac tgg ggt... |
| <i><u>In frame (17)</u></i> |                             |                                              |                                       |
| 03                          | ...tac tgt ac               | g ggg ggt aac ctc t                          | at tac tat gct atg gac tac tgg ggt... |
| 05                          | ...tac tgt aca aga          | cac ggg ggt aac tac gtc ggg                  | tat gct atg gac tac tgg ggt...        |
| 06                          | ...tac tgt                  | acg acc ctc tac ggt agt agc cct aag gcc t    | ct atg gac tac tgg ggt...             |
| 07                          | ...tac tgt gca aga          | cat tcc ccc tat ggc cct g                    | ac tat gct atg gac tac tgg ggt...     |
| 12                          | ...tac tgt gca aga          | cat tcc tac tat ggt aac tac g                | at tac tat gct atg gac tac tgg ggt... |
| 13                          | ...tac tgt gca ag           | g gcc tac tat ggt aaa gg                     | t gct atg gac tac tgg ggt...          |
| 15                          | ...tac tgt                  | ata gct acg tgg aga                          | gct atg gac tac tgg ggt...            |
| 19                          | ...tac tgt gca a            | cc tat gat ggt tac cc                        | c tat gct atg gac tac tgg ggt...      |
| 20                          | ...tac tgt gca ag           | c aac tac ggt agt agc tac cta                | tat gct atg gac tac tgg ggt...        |
| 23                          | ...ttc tgt tca aga          | ggc tat ggt aac                              | tac tat gct atg gac tac tgg ggt...    |
| 25                          | ...tac tgt gca aga          | cgg atc tat gat ggt tac tac gtg gga act tc   | t tac tat gct atg gac tac tgg ggt...  |
| 26                          | ...tac tgt gca aga          | aaa ctg ggc cgg ggt t                        | at tac tat gct atg gac tac tgg ggt... |
| 28                          | ...tac tgt gca ag           | g gat atg gat tact ac ggt agt agc tac ggc gg | t tac tat gct atg gac tac tgg ggt...  |
| 31                          | ...tac tgt gc               | c gta gta acc atc a                          | at gct atg gac tac tgg ggt...         |
| 35                          | ...tac tgt gca ag           | t gag ggg gat ggt tac cc                     | c tat gct atg gac tac tgg ggt...      |
| 39                          | ...tac tgt gca aga          | aaa ctg ggc cgg ggt t                        | at tac tat gct atg gac tac tgg ggt... |
| 48                          | ...tac tgt gca ag           | g att act acg gta gta gag agg ggg            | tat gct atg gac tac tgg ggt...        |

*Out of frame (22)*

|    |                    |                                            |                                          |
|----|--------------------|--------------------------------------------|------------------------------------------|
| 08 | ...tac tgt gca aga | cgg gac act acg cct acc gg                 | c tat gga cta ctg ggg tca...             |
| 09 | ...tac tgt gca aga | cgg gtt ggg atg gg                         | c tat gga cta ctg ggg tca...             |
| 10 | ...tac tgt gca ag  | t ccc tat tac tac ggt aga gg               | a cta tgc tat gga cta ctg ggg tca...     |
| 11 | ...tac tgt gca ag  | c cgt tat tact ac ggt agt agc tac ga       | g cta tgg act act ggg gtc...             |
| 17 | ...tac tgt gca aga | cag ggt acg gta gta gg                     | t atg cta tgg act act ggg gtc...         |
| 21 | ...tac tgt gca aga | ccg cct tat tac tac ggt agt agc tac gaa gg | t gga cta ctg ggg tca...                 |
| 24 | ...tac tgt gca aga | cgg gcg tat ggt aac tac ag                 | g cta tgg act act ggg gtc...             |
| 29 | ...tac tgt ttg aga | cat gta cgg gta ggg g                      | ta tgc tat gga cta ctg ggg tca...        |
| 32 | ...tac tgt gca aga | cct cat agg tac gca                        | act atg cta tgg act act ggg gtc...       |
| 33 | ...tac tgt gca aga | ggt atg gtt acg acc ct                     | a tta cta tgc tat gga cta ctg ggg tca... |
| 34 | ...tac tgt gca aga | cat atg att acg ttg                        | att act atg cta tgg act act ggg gtc...   |
| 36 | ...tac tgt gca aga | gaa gac gga gac tat agg tcc ggt            | cta tgg act act ggg gtc...               |
| 37 | ...tac tgt gca aga | cag ggt aca agg gg                         | g cta tgg act act ggg gtc...             |
| 38 | ...tac tgt gca aga | ttt ctc att tac gac ggg g                  | ct atg cta tgg act act ggg gtc...        |
| 40 | ...tac tgt gca aga | ctc ctt atg gta aag                        | atg cta tgg act act ggg gtc...           |
| 41 | ...tac tgt gca aga | caa ggt ccc tac tat agg tac ggc            | act atg cta tgg act act ggg gtc...       |
| 42 | ...tac tgt         | acc agg ccc cac tat tac tac ggt agt agc c  | tt act atg cta tgg act act ggg gtc...    |
| 43 | ...tac tgt gca ag  | g ggt tac tat agg tac gac gcg g            | ta cta tgc tat gga cta ctg ggg tca...    |
| 44 | ...tac tgt gca aga | gag gta act c                              | ct atg cta tgg act act ggg gtc...        |
| 45 | ...tac tgt gca aga | cac gac ccc tct a                          | ga ctg ggg tca...                        |
| 49 | ...tac tgt gca ag  | g gat cgt gaa ggt acg tca tc               | c tat gga cta ctg ggg tca...             |
| 50 | ...tac tgt gca aga | ggg ggt atg att acg acg ccg                | tta cta tgc tat gga cta ctg ggg tca...   |

*Premature stop codon (4)*

|    |                    |                       |
|----|--------------------|-----------------------|
| 01 | ...tac tgt gca ag  | g gat tta tga         |
| 02 | ...tac tgt gca ag  | g gat cta cta tga     |
| 18 | ... tac tgt gca ag | c ccc gaa gga cta tag |
| 27 | ... tac tgt gca a  | aa gat cta cgg tag    |
